# **Akt/Foxo pathway activation switches apoptosis to senescence in short telomere zebrafish**

Mounir El-Mai<sup>1,2\*</sup>, Marta Marzullo<sup>1\*</sup>, Inês Pimenta de Castro<sup>1\*</sup> and Miguel Godinho Ferreira<sup>1,2</sup>

1. Instituto Gulbenkian de Ciência, 2781-901 Oeiras, Portugal

2. Institute for Research on Cancer and Aging of Nice (IRCAN), Université Côte d'Azur, UMR7284 U1081 UNS 06107, Nice, France.

\* These authors contributed equally in this work

Corresponding Author: [Miguel-Godinho.FERREIRA@unice.fr](mailto:Miguel-Godinho.FERREIRA@unice.fr)

Keywords: Telomeres, Telomerase, Apoptosis, Senescence, AKT/FoxO, Aging

38 **ABSTRACT**

39 Progressive telomere shortening during lifespan is associated with increased genome instability,  
40 block to cell proliferation and aging. Apoptosis and senescence are the two main cellular  
41 outcomes upon irreversible cell damage. In this study, we show a transition between apoptosis  
42 to senescence in cells of two independent tissues in telomerase zebrafish mutants. In young  
43 mutants, proliferative tissues exhibit defects in cell proliferation and p53-dependent apoptosis,  
44 but no senescence. Progressively, these tissues display signs of tissue dysfunction, loss of  
45 cellularity and increased senescence. These alterations are accompanied by an activation of  
46 pro-proliferative stimulus mediated by AKT. Consequently, FoxO1 and FoxO4 transcriptional  
47 factors are inactivated, reducing SOD2 levels, causing an increase in ROS. These alterations  
48 elicit the activation of the zebrafish p16/15 and senescence. Thus, upon telomere shortening in  
49 aging, early apoptosis induces compensatory proliferation. However, progressive decline in cell  
50 proliferation results in tissue damage and proliferative signals, promoting a switch to  
51 senescence.

52

## 53 INTRODUCTION

54 Accumulation of DNA damage impairs cellular function and has been related to defects  
55 in tissue function, diseases and aging (Jackson and Bartek, 2009). To contrast the accumulation  
56 of damage, cells evolved DNA repair mechanisms. However when the damage persist cells  
57 undergo cell-cycle arrest, resulting in apoptosis or senescence (Childs et al., 2014).

58 Apoptosis is a programmed cell death, as a consequence of cell defects, and is highly  
59 regulated and p53-dependent. Apoptotic cells are usually eliminated from the tissue and  
60 replaced in highly proliferative tissues to maintain tissue homeostasis (Fogarty and Bergmann,  
61 2017).

62 Senescence is a permanent cell-cycle arrest, generally associated with pro-inflammatory  
63 phenotype, known as Senescence Associated Secretory Phenotype (SASP) (Coppé et al.,  
64 2008). Senescent cells accumulates over time, and has been proposed that persistent SASP  
65 production can be associated to aging and age-related phenotypes (Krishnamurthy et al., 2004).

66 The CDK inhibitor (CKI) p16 encoded by the INK4A/ARF locus is a tumor suppressor  
67 that limits cell proliferation and is associated with cell senescence (Liao and Hung, 2003). It  
68 belongs to the INK family of CKIs that includes p15INK4b, p18INK4c and p19INK4d (Kamb,  
69 1995; Vidal and Koff, 2000). The comparisons of the INK4a/ARF gene structure between man,  
70 mouse, chicken and the fugu fish revealed a dynamic evolutionary history of this locus (Gilley  
71 and Fried, 2001; Kim et al., 2003). p15INK4b (p15), a close relative of p16, is encoded by the  
72 INK4b gene, located immediately upstream of the INK4a/ARF locus. Similar to p16, this CKI has  
73 been associated to cell senescence (Fuxe et al., 2000; Hitomi et al., 2007; Senturk et al., 2010).  
74 In chicken, as in fugu fish, INK4a is mutated and does not encode a functional protein. Thus,  
75 fugu fish INK4a locus expresses Arf but not p16 (Liao and Hung, 2003), suggesting that the  
76 function of p16 was possibly being taken over by p15.

77 Under physiological conditions, cells with a high turn-over rate, including epithelial and  
78 germinal cells, preserve tissue homeostasis by undergoing continuous cellular proliferation and  
79 apoptosis. Nevertheless, cells can only go through a finite number of divisions before entering  
80 an irreversible cell-cycle arrest, process known as replicative senescence. Telomere erosion  
81 has been proposed to constitute the “molecular clock” that determines the number of divisions a  
82 cell can undergo before reaching senescence, phenomenon known as Hayflick limit (Bodnar et  
83 al., 1998; Hayflick, 1965).

84 Telomeres are nucleoprotein complexes that protect the extremities of linear  
85 chromosomes and counterbalance incomplete replication of terminal DNA (Jain and Cooper,  
86 2010; O’Sullivan and Karlseder, 2010). In most eukaryotes, the end replication problem is

87 solved by telomerase, which expression is restricted in most human somatic cells (Forsyth et  
88 al., 2002). Consequently, telomeres shorten significantly during human aging (Aubert and  
89 Lansdorp, 2008).

90 Vertebrate telomerase mutant animal models have been used to assess the direct  
91 association between telomere shortening and tissues dysfunction. Late generation (G4-6)  
92 telomerase knockout mice present premature features of aging, including reduced cell  
93 proliferation and increased apoptosis of several tissues (Lee et al., 1998; Rudolph et al., 1999).  
94 In zebrafish, first generation telomerase mutants (*tert*<sup>-/-</sup>) present short telomeres and promptly  
95 display premature aging phenotypes including tissue decline (Anchelin et al., 2013; Carneiro et  
96 al., 2016a; Henriques et al., 2013).

97 In the absence of telomerase, telomeres become critically short, accumulate  $\gamma$ H2A.X and  
98 activate the DNA Damage Response (DDR) (d'Adda di Fagagna et al., 2003). One of the  
99 mediators of DDR is the onco-suppressor p53, which accumulates upon telomere shortening  
100 and causes either cell senescence or apoptosis (Li et al., 2016). So far, it is unclear what are  
101 the signals determining one or the other cell fate in response to p53 accumulation.

102 Previous studies suggested that cellular senescence is associated with increased levels  
103 of mTORC/AKT signaling (Miyachi et al., 2004; Moral et al., 2009). AKT is a serine/threonine  
104 protein kinase that is activated upon pro-proliferative extracellular signals. This pathway is  
105 triggered by growth factor receptors, including the Insulin Growth Factor Receptor (IGFR) (Liao  
106 and Hung, 2010). Activation of AKT and mTORC2-mediated phosphorylation result in the  
107 phosphorylation of the forkhead transcriptional factors, FoXO1 and FoxO4 (Tuteja and  
108 Kaestner, 2007). Once phosphorylated, the FoXO family proteins translocate outside the  
109 nucleus thus resulting in the repression of their main target genes, including the superoxide  
110 dismutase SOD2. Prolonged and uncontrolled activation of this pathway results in mitochondrial  
111 dysfunction and increased ROS levels (Nogueira et al., 2008).

112 In this study, we investigated the *in vivo* switch between apoptosis and cell senescence  
113 as a consequence of telomere shortening in *tert*<sup>-/-</sup> zebrafish. We describe that early in life,  
114 telomerase deficiency results in p53 mediated apoptosis and loss tissue homeostasis, causing  
115 pro-proliferative AKT pathway activation in older individuals. AKT/FoxO signal cascade then  
116 triggers a switch that results in mitochondrial dysfunction, increased levels of ROS and p15/16  
117 leading to cell senescence.

118

## 119 **RESULTS**

### 120 ***tert*<sup>-/-</sup> zebrafish proliferative tissues undergo a time-dependent switch from apoptosis to** 121 **cell senescence**

122 Apoptosis is a process in which programmed cell death allows for clearance of damaged  
123 cells (Hawkins and Devitt, 2013). In contrast, replicative senescence is a state of terminal  
124 proliferation arrest, associated to gradual telomeres attrition occurring during cell division  
125 (Olovnikov, 1973; Shay and Wright, 2000). To explore the molecular mechanisms underlying  
126 the cell-fate decision between apoptosis and senescence, we used telomere attrition as a  
127 trigger of these two possible outcomes.

128 First-generation *tert*<sup>-/-</sup> zebrafish have shorter telomeres than their wild-type (WT)  
129 siblings, develop several degenerative conditions affecting mainly highly proliferative tissues,  
130 such as the testis and gut, and die prematurely (Anchelin et al., 2013; Carneiro et al., 2016a;  
131 Henriques et al., 2013). At 3 months of age, *tert*<sup>-/-</sup> fish are macroscopically similar to their WT  
132 siblings (Carneiro et al., 2016a), with testis and gut being histologically indistinguishable from  
133 WT (Figure 1A). However, at this early age, average telomere length is short and trigger the  
134 onset of DDR and increased apoptosis in *tert* mutants (Carneiro et al., 2016a). We analyzed the  
135 presence of apoptotic cells in 3 months-old *tert*<sup>-/-</sup> gut and testis using the TUNEL assay. We  
136 confirmed that, even in the absence of macroscopic defects, *tert*<sup>-/-</sup> gut and testis exhibits a  
137 higher number of apoptotic TUNEL-positive cells compared to their WT siblings (Figure 1C). In  
138 order to confirm the activation of DDR, we analyzed the phosphorylation levels of the DNA  
139 damage marker  $\gamma$ H2A.X on whole cell lysates from gut and testis of 3 month-old *tert*<sup>-/-</sup> zebrafish  
140 (Figure 1E, quantification in Supp. Figure 1). We detected a significant increase of the ATM-  
141 dependent phosphorylated form of  $\gamma$ H2A.X in ser139 in both 3 month-old *tert*<sup>-/-</sup> gut and testis  
142 (Figure 1E, quantification in Supp. Figure 1). As expected, we observed a concomitant increase  
143 p53 protein levels in both tissues of *tert*<sup>-/-</sup> zebrafish (Figure 1E, quantification in Supp. Figure 1).

144 In light of the differences found between the *INK4a/ARF* locus in zebrafish and  
145 mammals, we decided to test the conservation of the protein and the validity of the mammalian  
146 anti-p16 antibody (sc-1661, Santa Cruz Biotechnology) used for the senescence analysis. To  
147 this purpose, we designed antisense morpholino oligonucleotides (p15/16 MOs) and injected  
148 increasing amounts in 1 cell-stage embryos (Supp. Figure 2). A control morpholino sequence  
149 was included as negative control (CTR MO). At 3dpf upon morpholino injection, larvae were  
150 collected and tested for the expression of the p15/16 protein in zebrafish. Western Blot analysis  
151 revealed that injection of increasing concentration of p15/16 MOs causes a reduction in the

152 amount of the protein recognized by the anti-p16 antibody, indicating that the sequence of the  
153 protein associated to senescence is conserved from mammals to zebrafish (Supp. Figure 2).

154 Strikingly, even though DDR is active in 3-month-old *tert*<sup>-/-</sup>, the analyzed tissues did not  
155 exhibit signs of cellular senescence. We were unable to detect senescence-associated beta-  
156 galactosidase (SA-beta-Gal) activity in both gut and testis in *tert*<sup>-/-</sup> fish (Figure 1C). Accordingly,  
157 we observed no differences in expression of the senescence marker p15/16 by qRT-PCR,  
158 western blot (Figure 1E) or by immunofluorescence staining (Figure 1C). Therefore, at 3 month  
159 *tert*<sup>-/-</sup> in which tissue integrity is retained, telomere dependent DDR signalling predominantly  
160 induces apoptosis but no detectable cell senescence.

161 To investigate the consequences of telomere erosion and chronic DDR activation in  
162 aging, we analysed testis and gut of older *tert*<sup>-/-</sup> animals (9 month of age). Contrary to what we  
163 observed in 3 month old fish, older *tert*<sup>-/-</sup> zebrafish exhibit tissue morphological defects (Figure  
164 1B), including testis atrophy and width lengthening of the gut lamina propria (as described  
165 previously -(Carneiro et al., 2016a)-).

166 Because telomere shortening is known to induce both apoptosis and cell senescence,  
167 we wondered if the decline in tissue homeostasis represented a change in cell fate. Surprisingly,  
168 at 9 month of age, we could not observe clear differences in p53 levels between WT and *tert*<sup>-/-</sup>  
169 (Figure 1F). In fact, *tert*<sup>-/-</sup> gut and testis exhibited a decline in apoptosis in 9 month- compared  
170 to 3 month-old fish, denoting a decrease in TUNEL positive cells (Figure 1D). In contrast, at this  
171 stage, these tissues exhibited a clear accumulation of senescent cells in *tert*<sup>-/-</sup> compared to WT,  
172 as revealed by SA-beta-Gal staining (Figure 1D). Increased senescence was confirmed by an  
173 increase in p15/p16 by immunofluorescence (Figure 1D), mRNA and protein levels (Figure 1E).  
174 In addition, we observed that reduction of apoptotic cells and increase of senescent cells was  
175 concomitant with higher levels of expression of Bcl-XL mRNA suggesting an activation of anti-  
176 apoptotic pathways in old *tert*<sup>-/-</sup> fish (Supp. Figure 3). Taken together, these results show in vivo  
177 a switch from apoptosis to senescence during aging of *tert* mutant fish, and that this switch  
178 associates with age-dependent tissue degeneration.

179

## 180 **ROS accumulation and mitochondrial dysfunction become apparent upon short** 181 **telomere-induced senescence**

182 In mammalian systems, similarly to what we observe in zebrafish, DNA damage initially  
183 halts cell-cycle progression through a p53/p21-mediated cell-cycle arrest (Rodriguez and Meuth,  
184 2006) (Figure 1E). But if lesions persist, expression of p16Ink4a predominates as a  
185 consequence of mitochondrial dysfunction and ROS production (Freund et al., 2011; Passos et

186 al., 2010). Late generation telomerase knockout mice were observed to induce mitochondrial  
187 dysfunction through p53-dependent suppression of the master regulator of mitochondrial  
188 biogenesis, PGC1 $\alpha$  (Sahin et al., 2011). G4 mTERT deficient mice exhibit significant alterations  
189 in mitochondrial morphology, accumulation of ROS and reduced ATP generation (Sahin et al.,  
190 2011).

191 We investigated if mitochondrial dysfunction could play a part in the apoptosis to  
192 senescence switch observed in *tert*<sup>-/-</sup> zebrafish. First, we started by examining if p53 activation  
193 triggers the repression of PGC1 $\alpha$  in zebrafish. Curiously, despite significant accumulation of  
194 p15/16 and p53 (Figure 1F), we did not observe differences in terms of RNA or protein levels of  
195 PGC1 $\alpha$  in older *tert*<sup>-/-</sup> gut extracts (Supp. Figure 4). However, we did detect a robust increase in  
196 oxidative damage with age. By 3 months of age, the levels of ROS in *tert*<sup>-/-</sup> gut and testis do not  
197 differ significantly from their WT siblings (Figure 2A). Later, we observed a gradual and  
198 significant accumulation of ROS in both tissues from 6 months onward in *tert*<sup>-/-</sup> compared to WT  
199 controls (Figure 2A). Production of ROS, especially superoxide, is a necessary by-product of  
200 mitochondrial respiration (Murphy, 2009). Mitochondrial dysfunction is characterized by  
201 concurrent high superoxide production leading to a breakdown of membrane potential that  
202 compromises energy production and cellular metabolism (Balaban et al., 2005). In agreement  
203 with previous findings, we observed that testis mitochondrial ultrastructure became significantly  
204 fragmented in older *tert*<sup>-/-</sup> zebrafish (arrows, Figure 2B). Similarly, gut mitochondrial morphology  
205 became increasingly rounded and swollen with the appearance of perturbed crystal structure  
206 (arrows, Figure 2B). Consistently, we observed a significant reduction of levels of ATP in both  
207 tissues of *tert* mutants (Figure 2C). Together, these results indicate that mitochondrial function  
208 declines dramatically during aging of *tert*<sup>-/-</sup> proliferative tissues, supporting the idea that a  
209 change in mitochondrial homeostasis may dictate the tissue's cell-fate decision.

210

### 211 **AKT promotes ROS production by blocking the FoxO1/FoxO4-SOD2 molecular axis.**

212 Excessive ROS formation gives rise to oxidative stress, leading to cellular damage and,  
213 eventually, senescence (Velarde et al., 2012). Mitochondrial manganese superoxide dismutase  
214 (SOD2) is one of the major ROS scavengers. Notably, SOD2 expression decreases with age  
215 (Tatone et al., 2006; Velarde et al., 2012). SOD2 KO mice and connective tissue-specific SOD2  
216 KOs have reduced lifespan and exhibit premature aging phenotypes associated with  
217 senescence but no onset of apoptosis (Treiber et al., 2011; Velarde et al., 2012).

218 To gain mechanistic insights into the nature of the oxidative damage observed in the  
219 *tert*<sup>-/-</sup> zebrafish, we decided to analyse the expression levels of this important antioxidant

220 defence enzyme. Western blot analysis of 9 months-old testis and gut samples, showed a  
221 significant decrease in terms of protein levels of SOD2 in *tert*<sup>-/-</sup> mutants compared to WT  
222 (Figure 3A). In contrast, SOD2 levels were not affected in *tert*<sup>-/-</sup> at 3 months of age (Supp Fig.  
223 5). This result suggests that the mechanism that copes with superoxide production is  
224 compromised in older *tert*<sup>-/-</sup> mutants and, therefore, possibly responsible for the accumulation of  
225 oxidative damage in the affected tissues.

226 Phosphorylation (inactivation) of FoxO-family by the AKT kinase causes the elevation of  
227 intracellular ROS levels through the repression of detoxifying enzymes, such as SOD2 (Brunet  
228 et al., 1999; Kops et al., 2002; Miyamoto et al., 2007). FoxO proteins are a family of  
229 transcription factors responsible for a wide range of cellular processes, including cell cycle  
230 arrest, DNA damage response, metabolism and ROS detoxification (Greer and Brunet, 2005).  
231 Phosphorylation of FoxO by AKT triggers the rapid relocalization of FoxO from the nucleus to  
232 the cytoplasm, with the consequent downregulation of FoxO target genes. We, therefore,  
233 hypothesised that activation of AKT/FoxO signalling was responsible for the increased oxidative  
234 stress in older *tert*<sup>-/-</sup> zebrafish. As expected, increased phosphorylation levels of FoxO1 and  
235 FoxO4 were correlated with lower expression levels of SOD2 (Figure 3A, quantification in Supp.  
236 Figure 6). Phosphorylation of FoxO proteins suggests that inactivation of these transcription  
237 factors may be the cause for the down-regulation of SOD2 in older *tert*<sup>-/-</sup> gut and testis.

238 AKT is a highly conserved central regulator of growth-promoting signals in multiple cell  
239 types. The kinase activity and substrate selectivity of AKT are principally controlled by  
240 phosphorylation sites. Phosphorylation of serine 473 (pAKT-Ser473), is a consequence of  
241 activation of mammalian target of rapamycin complex 2 (mTORC2) (Sarbasov et al., 2005).  
242 pAKT-Ser473 is required for phosphorylation and inactivation of the FoxOs (Guertin et al.,  
243 2006). Accordingly, while we did not observe differences in total AKT protein levels, we detected  
244 a significant increase in the phosphorylated levels of pAKT-Ser473 denoting full activation of  
245 AKT in older but not younger *tert*<sup>-/-</sup> zebrafish (Figure 3A, quantification in Supp. Figure 6).  
246 Therefore, AKT activation correlates with increased levels of FoxO inhibitory phosphorylation  
247 and concomitant decrease in SOD2 protein levels in *tert*<sup>-/-</sup> mutants when compared to WT.  
248 Collectively, our results suggest that, upon tissue damage in older *tert*<sup>-/-</sup> zebrafish, activation of  
249 a pro-proliferative signaling pathway leads to AKT-dependent inactivation of FoxO1 and FoxO4,  
250 which in turn causes the down-regulation of SOD2 expression. These events impact on  
251 oxidative stress, triggering p15/p16 accumulation, causing a consequent senescent  
252 (irreversible) cell-cycle arrest.

253



254 **p53<sup>-/-</sup> rescue of tert<sup>-/-</sup> apoptosis delays the appearance of tissue degeneration and**  
255 **cellular senescence**

256         Activation of a pro-proliferative pathway in an organism that exhibits defects in cell  
257 proliferation was somehow surprising. However, one major difference between 3 and 9 months-  
258 old gut and testis was the increasing tissue damage (Figure 1 A and B). In addition to our  
259 previous observation of reduction in the number of cell divisions (Carneiro et al., 2016a), tissue  
260 damage may be explained by increased cell death that predominates 3 months-old tert<sup>-/-</sup> testis  
261 and gut (Figure 1C).

262         In order to compensate for the empty space, dying cells in proliferative tissues induce  
263 compensatory proliferation in neighboring cells through the secretion of mitogenic signals  
264 (Tamori and Deng, 2014). Thus, we hypothesized that activation of the mitogenic AKT/FoxO  
265 signaling pathway was triggered to promote tissue repair in response to build up of tissue  
266 damage in tert<sup>-/-</sup> zebrafish. To test this hypothesis, we decided to rescue tissue degeneration by  
267 preventing p53 function and thereby unblock cell proliferation while restraining cell death. This  
268 way, we expected to thwart the induction of the AKT/FoxO proliferative pathway in older tert<sup>-/-</sup>  
269 fish and, consequently, the appearance of cell senescence.

270         We used tert<sup>-/-</sup> p53<sup>-/-</sup> double-mutant zebrafish where p53 deficiency rescues the  
271 adverse effects of telomere loss (Anchelin et al., 2013; Henriques et al., 2013). Consistent with  
272 our previous results, by preventing a p53-mediated response to telomere dysfunction, we were  
273 able to rescue the histopathological defects of older tert<sup>-/-</sup> testis and gut (Figure 4A and 4E). In  
274 the absence of observable tissue damage, we were no longer able to detect activation of AKT  
275 (pAKT-Ser473, Figure 4B and 4F), down-regulation of SOD2 (Figure 4B and 4F), nor  
276 accumulation of ROS (Figure 4C and 4G) in tert<sup>-/-</sup> p53<sup>-/-</sup> zebrafish. Finally, consistent with our  
277 hypothesis, older tert<sup>-/-</sup> p53<sup>-/-</sup> double-mutant gut and testis no longer exhibit an accumulation of  
278 SA-beta-Gal-positive cells (Figure 4D and 4H). Taken together, our results demonstrate that  
279 p53 is required for AKT activation and the onset of senescence in older tert<sup>-/-</sup> fish. Moreover,  
280 they suggest that the age-dependent switch from apoptosis to senescence is intimately linked to  
281 the loss of tissue homeostasis. In 3 month-old tert<sup>-/-</sup> zebrafish, telomeres are sufficiently short to  
282 trigger DDR and p53-dependent apoptosis. However, no tissue damage is observed in younger  
283 animals and this becomes apparent with age-dependent decline in cell proliferation. An older  
284 tissue with short telomeres and limited proliferative capacity responds by promoting mitogenic  
285 signalling thereby activating the AKT/FoxO pathway and consequent mitochondrial dysfunction.

286  
287

## 288 **Inhibition of AKT activity prevents senescence in G1 and G2 tert<sup>-/-</sup> mutants**

289 Our data indicates that activation of AKT in older tert<sup>-/-</sup> zebrafish correlates with the  
290 appearance of the senescence phenotype. To understand the direct role of the AKT/FoxO  
291 pathway in modulating the p15/p16-mediated cell-cycle arrest, we decided to test if AKT  
292 activation was causal to cell senescence. Our hypothesis would dictate that AKT  
293 phosphorylation inhibition would prevent p15/p16 expression and preserve tissue homeostasis.

294 AKT phosphorylation is mediated by the mTORC2 complex, which the main component  
295 is the mTOR (mammalian Target Of Rapamycin) protein (Laplante and Sabatini, 2009). To  
296 analyze the role of AKT activation in inducing senescence upon telomere shortening, we  
297 created a double mutant bearing a mutation in the tert gene combined with a mutation in the  
298 mTOR zebrafish homologue (zTOR). Previous work showed that zTOR is essential for  
299 development and zTOR<sup>-/-</sup> zebrafish are larval lethal (Ding et al., 2011). However, zTOR<sup>+/-</sup>  
300 mutants are haploinsufficient, with the lack of one functional copy being sufficient to reduce AKT  
301 phosphorylation (Ding et al., 2011). Thus, we decided to test our hypothesis in tert<sup>-/-</sup> ztor<sup>+/-</sup>  
302 mutant zebrafish. As expected, tert<sup>-/-</sup> ztor<sup>+/-</sup> present reduction in AKT phosphorylation  
303 compared to tert<sup>-/-</sup> single mutants in 11 month-old fish (Figure 5). Consistent with our  
304 hypothesis, this reduction is associated with a reduction in the expression of p15/16 (Figure 5),  
305 suggesting that preventing the activation of AKT can be sufficient to reduce aging-associated  
306 senescence (Figure 5 A-B). Given the incomplete nature of zTOR inhibition, haploinsufficiency  
307 for ztor in a tert<sup>-/-</sup> mutant background was insufficient to restore tissue morphology in testis and  
308 tert<sup>-/-</sup> mutant gut defects (Supp. Figure 7). Our data corroborates previous reports that  
309 disruption of zTOR partially inhibits AKT activation and, consequently, reduces p15/16  
310 expression and with an amelioration tissue morphology of older tert<sup>-/-</sup> mutant.

311 Given the previous incomplete AKT inhibition in older tert<sup>-/-</sup> zebrafish, we decided to  
312 attempt a chemical inhibition in tert<sup>-/-</sup> fish with very short telomeres. Second generation  
313 telomerase-deficient zebrafish (G2 tert<sup>-/-</sup>), obtained from incross of homozygous tert mutants,  
314 recapitulate most of the phenotypes of old tert<sup>-/-</sup> G1 fish (Anchelin et al., 2013; Henriques et al.,  
315 2013). G2 tert<sup>-/-</sup> have morphological defects, along with extremely short telomeres and lifespan.  
316 Consistent with the phenotypical recapitulation of older G1 tert<sup>-/-</sup> mutants, we observed that G2  
317 tert<sup>-/-</sup> exhibited a marked increase of senescence revealed by SA-beta-Gal staining and  
318 expression of senescence associated markers, p15/p16 (Figure 5A-B). Similar to older G1 tert<sup>-/-</sup>  
319 zebrafish, analysis of G2 tert<sup>-/-</sup> larvae showed that increase of senescence by p15/16  
320 expression is concomitant with increased pAKT phosphorylation, decreased SOD2 and,  
321 consequently increase of ROS species (Figure 5C-D). Our data thus indicates that G2 tert<sup>-/-</sup>

322 larvae recapitulates aging-associated AKT activation and senescence observed in old  
323 telomerase-deficient fish.

324 We decided to use the G2 *tert*<sup>-/-</sup> model to assess a direct link between AKT activation  
325 and increase in cell senescence, by testing whether direct AKT kinase inhibition would be  
326 sufficient to prevent p16 expression. For this purpose, we daily treated *tert*<sup>-/-</sup> and WT larvae  
327 with an AKT inhibitor (AKT 1/2 kinase inhibitor, Santa Cruz) for 2 days (Figure 5E). At 6 dpf,  
328 larvae were collected and analyzed for AKT activation and expression of senescence markers.  
329 Treatment with the inhibitor reduces AKT phosphorylation and, as a consequence, leads to a  
330 decrease of p16 protein and mRNA levels compared to controls (Figure 5F-G). Our data thus  
331 show a direct link between AKT kinase activation and senescence in *tert*<sup>-/-</sup> zebrafish. Taken  
332 together our results indicate that the telomere shortening-associated premature senescence is  
333 dependent on the activation of the AKT/FoxO pathway.

334

## 335 **DISCUSSION**

336 Homeostasis in multicellular organisms depends on coordinated responses to external  
337 and internal insults challenging lifetime tissue integrity. Loss of tissue homeostasis is a hallmark  
338 of aging, resulting in pathologies often caused by defective or deregulated tissue damage  
339 responses (Neves et al., 2015). In proliferative tissues, homeostasis relies on a controlled  
340 balance between cell proliferation and apoptosis or senescence. Telomere attrition and DNA  
341 damage are major factors contributing to aging (López-Otín et al., 2013). When reaching a  
342 critical length, short telomeres trigger DNA Damage Responses and p53-dependent cell cycle  
343 arrest, eventually culminating in apoptosis or replicative senescence (Blackburn and Francisco,  
344 2001; Harley et al., 1990; Olovnikov, 1973; Shay and Wright, 2000). Most cell types seem to be  
345 capable of both cellular outcomes upon damage (Campisi and d'Adda di Fagagna, 2007), but  
346 the molecular mechanism determining cell fate between apoptosis and senescence in an  
347 organism remains unclear.

348 In the present study, we describe that young (3 month-old) telomerase deficient  
349 zebrafish already exhibit active DDRs and p53 activation. At this stage, apoptosis is the  
350 predominant cell fate. Even though DNA damage is present in proliferative tissues, such as gut  
351 and testis, no signs of cell senescence could be detected. However, we observed a switch  
352 between apoptosis and senescence in older *tert*<sup>-/-</sup> fish. In these animals, senescence becomes  
353 the most prevalent cellular response, exhibiting SA-beta-Gal and p15/p16 positive cells and  
354 elevated p15/p16 and p21 levels. This observation underscores the fact that the same tissue  
355 can undergo different cellular fates, apoptosis or senescence, depending on the animal's age.

356 The p53 transcription factor is described as a “master regulator” of several cellular  
357 processes, including cell cycle arrest, apoptosis, senescence and autophagy (Farnebo et al.,  
358 2010). p53 was first shown to trigger apoptosis in response to cellular stress (Vogelstein et al.,  
359 2000). However, it is now acknowledged that p53 modulates genes involved in senescence  
360 depending on the stress inflicted or cell type (Murray-Zmijewski et al., 2008). In late generation  
361 telomerase knockout mice, p53 was shown to be responsible for down-regulating of PGC1 $\alpha$  and  
362 PGC1 $\beta$  and mitochondrial dysfunction upon telomere shortening (Sahin et al., 2011). In our  
363 study, early p53 activation in *tert*<sup>-/-</sup> zebrafish does not visibly alter mitochondria function.  
364 However, both gut and testis of older *tert*<sup>-/-</sup> zebrafish show mitochondrial dysfunction  
365 accompanied by significant reduction of ATP levels and accumulation of ROS. These alterations  
366 are concomitant with the onset of cell senescence. However, in contrast to the previous study in  
367 mice, we do not detect a downregulation of PGC1 $\alpha$  either on mRNA or protein level. Even  
368 though p53 is required for the older *tert*<sup>-/-</sup> zebrafish phenotypes, our results suggest that the  
369 observed mitochondrial dysfunctions are independent of PGC1 $\alpha$  alterations.

370 The present study reveals that mitochondrial defects are associated with a reduction in  
371 SOD2 expression allied to an Akt-dependant FoxO1 and FoxO4 phosphorylation. The anti-  
372 proliferative p53 and pro-survival mTOR/Akt pathways interact in a complex manner. Depending  
373 on the context, the interaction of these pathways modulate cell fate into either cell-cycle arrest,  
374 apoptosis or senescence (Erol, 2011; Hasty et al., 2013). Cell line studies show that p53 itself  
375 can inhibit mTOR/Akt pathway through several mechanisms including AMPK and PTEN  
376 activation (Hasty et al., 2013). Moreover, p53 activation of cell senescence relies on mTOR/Akt  
377 pathway activity (Davaadelger et al., 2016; Jung et al., 2019; Kim et al., 2017; Miyauchi et al.,  
378 2004; Vétillard et al., 2015). Consistently, Akt inhibition reduces p53-dependent senescence  
379 (Davaadelger et al., 2016; Duan and Maki, 2017; Kim et al., 2017). In addition, Akt mediates the  
380 inhibition of pro-apoptotic factors (Davaadelger et al., 2016) and leads to increased levels of  
381 anti-apoptotic Bcl-xl (Jones et al., 2000; X. Li et al., 2017). Thus, activation of mTOR/Akt  
382 pathway can act as a negative regulator of apoptosis (Davaadelger et al., 2016; Duan and Maki,  
383 2017). Akt was shown to induce senescence and cell-cycle arrest by elevating the intracellular  
384 levels of ROS or activating p16 transcription through direct phosphorylation of the Bmi repressor  
385 (Imai et al., 2014; L. U. Li et al., 2017; Liu et al., 2012; Miyauchi et al., 2004; Nogueira et al.,  
386 2008). Accordingly, Akt activation in aged *tert* mutant zebrafish is concomitant with increased  
387 anti-apoptotic Bcl-xl and pro-senescence p15/p16 and p21 levels.

388 What constitutes the mechanistic nature of the switch from apoptosis to senescence?  
389 Even though young *tert*<sup>-/-</sup> mutants present no observable tissue defects, they exhibit high levels

390 of apoptosis and a reduction in proliferative capacity (Carneiro et al., 2016a; Henriques et al.,  
391 2013). High apoptosis increases the demand of cell proliferation from surrounding cells in a  
392 process termed apoptosis-induced compensatory proliferation (Fan and Bergmann, 2008).  
393 Thus, tissue degeneration becomes apparent in aging *tert*<sup>-/-</sup> zebrafish. In tissues where stem  
394 cells are not readily available or where tissue-intrinsic genetic programs constrain cell division,  
395 cellular hypertrophy represents an alternative strategy for tissue homeostasis (Losick et al.,  
396 2013; Tamori and Deng, 2013).

397 We propose that, upon telomere shortening and p53 activation, loss of tissue integrity  
398 triggers the AKT-dependent pro-proliferative pathway (Figure 3). The combination of these  
399 antagonistic forces in the cell would result in cellular senescence. We tested this hypothesis on  
400 both pathways. By genetically removing *tp53*, we were able to rescue tissue degeneration and  
401 avoid activation of AKT, accumulation of ROS and induction of senescence. On a second level,  
402 we inhibited TOR/Akt genetically by dampening the *ztor* pathway and, chemically, by directly  
403 inhibiting Akt in *G2 tert*<sup>-/-</sup> larvae. In both cases, we were able to reduce the effects of telomere  
404 shortening. Collectively, our results show that the crosstalk between two pathways telomere  
405 shortening/DDR and AKT/FoxO signalling regulate a apoptosis-to-senescence switch and  
406 contributes to tissue homeostasis *in vivo*.

407

## 408 **Acknowledgements**

409 We thank members of the Telomeres and Genome Stability Laboratory for helpful discussions.  
410 We thank the Instituto Gulbenkian de Ciência EM unit, histology unit and the Fish Facility for  
411 excellent animal care. MEM is a recipient of a postdoctoral fellowship from the Ville de Nice.  
412 This work was supported by the FCT (PTDC/SAU-ORG/116826/2010), Fondation Arc pour la  
413 Recherche sur le Cancer (PJA20161205137) and the Howard Hughes Medical Institute  
414 International Early Career Scientist grants received by MGF.

415

## 416 **Author contributions**

417 Conceived and designed the experiments: MGF, IC, MEM and MM. Performed the experiments:  
418 MEM, MM and IC. Analysed the data: IC, MEM, MM and MGF. Contributed  
419 reagents/materials/analysis tools: IC, MEM and MM. Wrote the paper: MGF, MEM, MM and IC.

420

421

## 422 MATERIALS AND METHODS

423

### 424 Ethics statement

425 All Zebrafish work was conducted according to National Guidelines and approved by the Ethical  
426 Committee of the Instituto Gulbenkian de Ciência and the DGAV (Direcção Geral de  
427 Alimentação e Veterinária, Portuguese Veterinary Authority).

428

### 429 Zebrafish lines and maintenance

430 Zebrafish were maintained in accordance with Institutional and National animal care protocols.  
431 The telomerase mutant line *tertAB/hu3430*, generated by N-Ethyl-N-nitrosourea (ENU)  
432 mutagenesis (Utrecht University, Netherlands; Wienholds, 2004), has a T-A point-mutation in  
433 the *tert* gene. *tertAB/hu3430* line is available at the ZFIN repository, ZFIN ID: ZDB-GENO-  
434 100412-50, from the Zebrafish International Re-source Center—ZIRC. The protocols used for  
435 outcrossing mutagenized male zebrafish were previously described (Carneiro et al., 2016b;  
436 Henriques et al., 2013). The *terthu3430/hu3430* homozygous mutant (*tert*<sup>-/-</sup>) was obtained by  
437 incrossing our *tertAB/hu3430* strain. WT siblings were used as controls. Overall characterization  
438 of *tert*<sup>-/-</sup> and WT zebrafish was performed in F1 animals produced by *tert*<sup>+/-</sup> incross. Due to a  
439 male sex bias in our crosses that affected mostly *tert*<sup>-/-</sup> progeny, we were unable to obtain  
440 significant numbers of females for analysis and so all of our data is restricted to males.

441 p53 mutant line *zdf1* (P53M214K) (Berghmans et al., 2005) was kindly provided by António  
442 Jacinto (CEDOC, chronic diseases, Nova medical school, Lisbon (Portugal)). p53 mutant line  
443 *zdf1* (P53M214K) is available at the ZFIN repository, ZFIN ID: ZDB-ALT-050428-2 from the  
444 Zebrafish International Re-source Center—ZIRC. The p53M214K/ p53M214K homozygous  
445 mutant (*p53*<sup>-/-</sup>) was obtained by incrossing our p53AB/M214K strain.

446 *ztor* line was obtained from the ZFIN repository, ZFIN ID: ZDB-ALT-120412-1 from the Zebrafish  
447 International Re-source Center—ZIRC. The line was previously described (Ding et al., 2011) as  
448 homozygous larval lethal and it was maintained through outcrossing. All animals showing signs  
449 of morbidity that persisted for up to 5 days, such as inability to eat or swim, or macroscopic  
450 lesions/tumors were sacrificed in 200 mg/L of MS-222 (Sigma, MO, USA).

451 .

### 452 Real-time quantitative PCR

453 Age- and sex-matched fish were sacrificed in 200 mg/L of MS-222 (Sigma, MO, USA) and  
454 portions of each tissue (gonads, gut and muscle) were retrieved and immediately snap-frozen in  
455 liquid nitrogen. Similarly, 4dpf larvae were sacrificed and collected in Eppendorf tube, minimum  
456 10 larvae each. RNA extraction was performed in TRIzol (Invitrogen, UK) by mashing each  
457 individual tissue with a pestle in a 1.5 ml eppendorf tube. After incubation at RT for 10 minutes  
458 in TRIzol, chlorophorm extractions were performed. Quality of RNA samples was assessed  
459 through BioAnalyzer (Agilent 2100, CA, USA). Retro-transcription into cDNA was performed  
460 using a RT-PCR kit NZY First-Strand cDNA Synthesis Kit # MB12501 (NZYtech).

461 Quantitative PCR (qPCR) was performed using iTaq Universal SYBR Green Supermix #  
462 1725125 (Bio-Rad) and an ABI-QuantStudio 384 Sequence Detection System (Applied  
463 Biosystems, CA, USA). qPCRs were carried out in triplicate for each cDNA sample. Relative  
464 mRNA expression was normalized to *rpl13a* (data not shown) mRNA expression using the DCT  
465 method. Primer sequences are listed in Table S1.

466

467 **Table S1 – List of primers used in RT-qPCR expression analysis and *tert* genotyping.**

| Gene name     | Primer sequences                                                                |
|---------------|---------------------------------------------------------------------------------|
| <i>p15/16</i> | forward – 5' GGATGAACTGACCACAGCAGCA 3'<br>reverse – 5' CGGCTGCGGAAAGAGTCTCAG 3' |
| <i>Bcl-XL</i> | forward – 5' GGGCTTGTTTGCTTGGTTGA 3'<br>reverse – 5' AGAACACAGTGCACACCCTT 3'    |
| <i>PGC1a</i>  | forward – 5' CTGTGGAACCCCAGGTCTGAC3'<br>reverse – 5' ACTCAGCCTGGGCCTTTTGCT 3'   |
| <i>RPL13</i>  | forward – 5' TTCACCACCACAGCCGAAAGA 3'<br>reverse – 5' TACCGCAAGATTCCATACCCA 3'  |

468

469

470 Detection of intracellular oxidant activity

471 Reactive oxygen species (ROS) accumulation was assessed by measuring the levels of the  
472 oxidized form of the cell-permeant 5-chloromethyl-2',7'-dichlorodihydrofluorescein diacetate  
473 (DCFDA) (Sigma). Briefly, zebrafish were euthanized with 200 mg/L of MS-222 (Sigma, MO,  
474 USA) and tissues such as the testis, gut and muscle were dissected. Each tissue was  
475 homogenized in 100 µl of ROS buffer (0.32 mM sucrose, 20mM hepes, 1mM MgCl<sub>2</sub> and 0.5mM  
476 Phenylmethanesulphonyl fluoride). Homogenates were centrifuged and 20 µl of the supernatant  
477 was transferred to a 96-well plate and incubated in 1 µg/ml of DCFDA for 30 minutes.  
478 Fluorescence values were measured with a Victor 3 plate reader (Perkin Elmer) and normalized  
479 to total protein content, which was determined by the Bradford method. N = 3 per time point.

480

481 Histological analysis

482 Zebrafish were sacrificed by anaesthetic overdose, in 200 mg/L of MS-222 (Sigma, MO, USA),  
483 fixed for 72 hours in 10% neutral buffered formalin and decalcified in 0.5MEDTA for 48 h. Whole  
484 fish were then paraffin-embedded and 3 micrometer midline sagittal sections were stained with  
485 haematoxylin and eosin for histopathological analysis. Sections were examined by a pathologist  
486 (TC), blinded to experimental groups and microphotographs were acquired in a Leica DM2500  
487 microscope coupled to a Leica MC170 HD microscope camera. At least 4 animals from each  
488 age group/genotype were analysed.

489

490 Immunofluorescence (IF) and confocal analysis

491 Apoptosis and Senescence was detected using the In Situ Cell Death Detection Kit (Roche,  
492 SW) according to manufacturer's instructions combined with Immunofluorescence against the

493 p15/16 senescence-associated factor. Briefly, deparaffinized slides were incubated with 40  
494  $\mu\text{g/ml}$  Proteinase K in 10 mM Tris-HCl pH 7.4, 45 minutes at 37°C. Slides were left to cool down  
495 for 30 minutes at room temperature (RT), washed three times in dH<sub>2</sub>O for 5 minutes each and  
496 blocked for 1 hour at RT in 1% BSA, 0,5% Tween 20 in PBST (Triton 0.5%). Subsequently the  
497 slides were incubated over-night with anti-p16 (F-12) (1:50, Santa Cruz Biotechnology, sc-  
498 1661), followed by 3x10 minute PBS washes. Incubation with the secondary antibody Alexa  
499 Fluor 568 goat anti-mouse (Invitrogen, UK, 1:500 dilution) overnight at 4°C was followed by  
500 three 10 minute PBS washes. The day after the slides were washed 2x5 minutes in PBS and  
501 then incubated with TUNEL labelling mix (protocol indicated by the supplier). Washing and  
502 mounting were performed by DAPI staining (Sigma, MO, USA) and mounting with DAKO  
503 Fluorescence Mounting Medium (Sigma, MO, USA).  
504 Images were acquired on a commercial Nikon High Content Screening microscope, based on  
505 Nikon Ti equipped with a Andor Zyla 4.2 sCMOS camera, using the a 20x 1.45 NA objective,  
506 DAPI + GFP fluorescence filter sets and controlled with the Nikon Elements software.  
507 For quantitative and comparative imaging, equivalent image acquisition parameters were used.  
508 The percentage of positive nuclei was determined by counting a total of 500–1000 cells per  
509 slide, 63x amplification (N = 3–4 zebrafish per time point/genotype).

#### 510 Senescence-associated $\beta$ -galactosidase assay

511  $\beta$ -galactosidase assay was performed as previously described (Kishi et al., 2008). Briefly,  
512 sacrificed zebrafish adults were fixed for 72h in 4% paraformaldehyde in PBS at 4°C and then  
513 washed three times for 1 h in PBS-pH 7.4 and for a further 1 h in PBS-pH 6.0 at 4°C.  $\beta$ -  
514 galactosidase staining was performed for 24 h at 37°C in 5 mM potassium ferrocyanide, 5 mM  
515 potassium ferricyanide, 2mM MgCl<sub>2</sub> and 1 mg/ml X-gal, in PBS adjusted to pH 6.0. After  
516 staining, fish were washed three times for 5 minutes in PBS pH 7 and processed for de-  
517 calcification and paraffin embedding as before. Sections were stained with nuclear fast red for  
518 nuclear detection and images were acquired in a bright field scan (Leyca, APERIO).

519

#### 520 Statistical and image analysis

521 Image edition was performed using Adobe Photoshop CS5.1 Statistical analysis was performed  
522 in GraphPad Prism5, using two-way ANOVA test with Bonferroni post-correction for all  
523 experiments comparing WT and tert-/- over time. For real-time quantitative PCR, statistical  
524 analysis was performed in GraphPad Prism5, two-way ANOVA with Bonferroni post-correction.  
525 A critical value for significance of  $p < 0.05$  was used throughout the study. For Western Blot the  
526 bands intensities were calculated using FIJI. Statistical analysis was performed using GraphPad  
527 Prism6, the significance was assigned according to the Mann-Whitney t-test. A critical value for  
528 significance of  $p < 0.05$  was used throughout the study.

529

#### 530 Immunoblot analysis

531 Age- and sex-matched adult zebrafish fish were sacrificed in 200 mg/L of MS-222 (Sigma, MO,  
532 USA) and portions of each tissue (gonads and gut) were retrieved and immediately snap-frozen  
533 in dry ice. 4dpf larvae were sacrificed in ice and collected in 1,5mL Eppendorf tube, minimum 10  
534 larvae /tube. Gonads tissues and larvae were then homogenized in RIPA buffer (sodium  
535 chloride 150mM; Triton-X-100 1%; sodium deoxycholate 0,5%; SDS 0,1%; Tris 50mM, pH=8.0),



536 including complete protease and phosphatase inhibitor cocktails (Roche diagnostics), with the  
537 help of a motor pestle. Protein extracts were incubated on ice for 30 minutes and centrifuged at  
538 4°C, 13.000 rpm, for 10 min. The supernatant was collected and added to 100 mL of protein  
539 sample buffer containing DTT.

540 Gut samples were homogenized in TRIzol (Invitrogen, UK) by mashing each individual tissue  
541 with a pestle in a 1.5 ml Eppendorf tube. After incubation at RT for 10 minutes in TRIzol,  
542 chlorophorm extractions were performed. The organic phase was collected and proteins were  
543 precipitated according to the manufacture protocol. The protein pellet was resuspended in 100ul  
544 of Lysis Buffer (150mM NaCl, 4%SDS, 50mM TrisHCl pH 8.0, 10mM EDTA, complete protease  
545 and phosphatase inhibitor cocktails-Roche diagnostics).

546 For each sample, a fraction of Proteins was separated on 12% SDS-PAGE gels and transferred  
547 to Immobilon PVDF membranes (Millipore). The membranes were blocked in 5% milk or 5%  
548 BSA (depending on the primary antibody), then incubated with the indicated primary antibody  
549 prior to incubation with the appropriate HRP-conjugated secondary antibody. Antibody  
550 complexes were visualised by enhanced chemiluminescence (ECL). Antibodies concentration:  
551 anti-Tp53 (1:1000, Anaspec, 55342); anti-g-H2AX (1:1000, GeneTex, GTX127342); anti-p16 (F-  
552 12) (1:700, Santa Cruz Biotechnology, sc-1661); anti-SOD-2 (1:1000, Sigma, SAB2701618);  
553 anti-phospho-AKT, Ser473 (1:1000, Cell Signaling, #4060); anti-total-Akt (1:1000 Cell Signaling,  
554 #9282, gift of Adrien Colin), anti-phospho-FoxO1, Ser256 (1:100, Cell Signaling, #9461); anti-  
555 Tubulin (1:5000, Sigma, T 6074).

556

#### 557 ATP measurement

558 Age- and sex-matched adult zebrafish fish were sacrificed in 200 mg/L of MS-222 (Sigma, MO,  
559 USA) and portions of each tissue (gonads, gut and muscle) were retrieved and immediately  
560 snap-frozen in dry ice. Each tissue was homogenised in 100 mL of 6M guanidine-HCl in  
561 extraction buffer (100mM Tris and 4mM EDTA, pH 7.8) to inhibit ATPases. Homogenised  
562 samples were subjected to rapid freezing in liquid nitrogen followed by boiling for 3 minutes.  
563 Samples were then cleared by centrifugation and the supernatant was diluted (1/50) with  
564 extraction buffer and mixed with luminescent solution (CellTiter-Glo Luminescent Cell Viability  
565 Assay, Promega). The luminescence was measured on a Victor 3 plate reader (Perkin Elmer).  
566 The relative ATP levels were calculated by dividing the luminescence by the total protein  
567 concentration, which was determined by the Bradford method. For Bradford assays, samples  
568 were diluted (1/50) with extraction buffer.

569

#### 570 Electron microscopy

571 For electron microscopy analysis, zebrafish tissues were processed according to Schieber et al,  
572 2010. Briefly, zebrafish were fixed in 2% Paraformaldehyde, 2.5% Glutaraldehyde in 0.1M  
573 PHEM buffer for 72h at 4°C. Dissected tissues were then washed 3 times in 0.1M PHEM.  
574 Tissues were transferred in 1% Osmium Tetroxide in 0.1M PHEM for 1h fixation on ice.  
575 Samples were then dehydrated before being processed for embedding using Epon (Schieber et  
576 al., 2010). 70 nm ultrathin sections were cut using Reichert Ultramicrotome. After being  
577 counterstained with uranyl acetate and lead, samples were analyzed using a transmission  
578 electron microscope (Hitachi H-7650).

579

580 AKT inhibitor larval treatment

581 AKT ½ kinase inhibitor (AKT inh) was purchased from Santa-Cruz (sc-300173). Stock solutions  
582 were prepared in DMSO. AKT inh was applied, after a titration, at 2uM concentration between  
583 days 3 and 5 post fertilization. Larvae were grown at 28°C and over the incubation periods,  
584 replacement of medium with the above mentioned compounds was performed every day,  
585 between 3 and 7 PM. Since the compound was dissolved in DMSO, controls were treated with  
586 the correspondent dilution of the solvent. The drug was tested in 2 independent trials. Finally,  
587 5dpf larvae were sacrificed and collected to perform protein and RNA analysis.

588 Gene knock-down using p15/16 Morpholino injection

589 One-cell stage WT embryos were injected with 2.4 ng or 3.6 ng of p15/16 mRNA specific  
590 translation blocking antisense morpholino oligonucleotides (MO) sequence (5'  
591 TCAGTTCATCCTCGACGTTTCATCAT 3') or 3.6 ng of standard control MO (5'  
592 CCTCTTACCTCAGTTACAATTTATA 3') (Gene Tools, USA). After 4 dpf, larvae were collected  
593 for further p15/p16 protein expression analysis.

594  
595

596 **FIGURE LEGENDS:**

597 **Figure 1. Proliferative tissues of tert<sup>-/-</sup> zebrafish exhibit a switch from apoptosis to**  
598 **senescence with age.**

599 A-B) Representative haematoxylin and eosin-stained sections of gut and testis from 3 month (A)  
600 or 9 month-old (B) WT and tert<sup>-/-</sup> siblings. While no macroscopic tissue defects are  
601 distinguishable at 3 months (N=3), 9 month-old tert mutants (N=3) exhibit altered gut and testis  
602 structures. C-D) Representative immunofluorescence images of apoptosis (TUNEL) or  
603 senescence (p15/p16 or SA-β-GAL) of gut and testis from 3 month (C) or 9 month-old (D) WT  
604 and tert<sup>-/-</sup> siblings (N=3 each). Dashed outlines locate zones of maturing spermatocytes (testis) or  
605 villi (gut). At 3month, both tissues show an increased number of apoptotic cells in tert<sup>-/-</sup>  
606 compared to WT. At that age, no signs of senescence are visible in these tissues. However,  
607 senescent cells appear in gut and testis of 9 month-old tert<sup>-/-</sup> fish depicting a switch between  
608 apoptosis and senescence at that age. E-F) Western blot and RT-qPCR analysis for DNA  
609 Damage and senescence associated genes in gut and testis of 3 month (E) or 9 month-old (F)  
610 WT and tert<sup>-/-</sup> siblings (N>=6 fish). RT-qPCR graphs are representing mean ±SEM mRNA fold  
611 increase after normalisation by RPL13a gene expression levels (\* p-value <0.05; \*\* p-  
612 value<0.01). At 3 month, gut and testis showed higher levels gH2AX and p53 proteins in tert<sup>-/-</sup>  
613 compared to WT but no differences in P15/p16 expression. At 9 month, senescence-associated  
614 p15/16 expression increased in tert mutant compared to WT siblings.

615  
616 **Figure 2. Gut and testis of tert<sup>-/-</sup> zebrafish are characterised by a time-dependant**  
617 **mitochondrial defect, increase of ROS levels and reduction of ATP levels.**

618 Compared to WT where difference are seen from 3 to 9 month, gut and testis of tert<sup>-/-</sup> exhibit a  
619 time dependant increase in ROS level and decrease of ATP levels (N>=3 fish per time point per  
620 genotype). Representative EM images of these tissues at 9 month revealed fragmented

621 mitochondrial ultrastructure in *tert*<sup>-/-</sup> testis and rounded and swollen mitochondria containing  
622 perturbed crystal structures (N>=3 fish). Data are represented as mean±SEM.

623

624 **Figure 3. Activation of Akt in old *tert*<sup>-/-</sup> leads to ROS accumulation by blocking the**  
625 **FoxO1/4-SOD2 Axis and promoting mitochondrial dysfunction.**

626 Representative immunoblot of p-Akt, total Akt, pFOXO1, pFOXO4 and SOD2 from testis and gut  
627 of 9 month-old *tert* mutant and WT siblings (N>=9). At 9 month, these proliferative tissues show  
628 an increased activation of Akt leading to the inhibition of FOXO-dependant SOD2 expression.

629

630 **Figure 4. Genetic inhibition of p53 prevents short telomeres-induced tissue degeneration,**  
631 **Akt activation, ROS accumulation and induction of senescence.**

632 A and E) Representative haematoxylin and eosin-stained sections of testis (A) and gut (E) from  
633 6 month-old WT, *tert*<sup>-/-</sup>, *p53*<sup>-/-</sup> and *tert*<sup>-/-</sup>/*p53*<sup>-/-</sup> siblings (N=3 fish each). Genetic inhibition of  
634 p53 rescues short-telomere dependant morphological defects of these tissues. B and F)  
635 Representative western blot analysis of pAkt and SOD2 in testis (B) and gut (F) (N=2 fish each).  
636 Inhibition of p53 impedes phosphorylation of Akt and downstream downregulation of SOD2  
637 leading to a rescue of increased ROS levels (C and G; N=3 fish per genotype) seen in *tert*<sup>-/-</sup>. D  
638 and H) Representative images of SA-β-GAL staining of testis (D) and gut (H) from 6 month-old  
639 WT, *tert*<sup>-/-</sup>, *p53*<sup>-/-</sup> and *tert*<sup>-/-</sup>/*p53*<sup>-/-</sup> siblings (N=3 fish). Inhibition of p53 counteract telomere  
640 shortening-induced senescence.

641

642 **Figure 5. Genetic and pharmacological inhibition of Akt prevents short telomeres-**  
643 **induced senescence.**

644 A)Western blot analysis of pAkt and B) RT-qPCR analysis of p15/p16 mRNA levels in 11 month-  
645 old gut of WT, *tert*<sup>-/-</sup>, *ztor*<sup>+/-</sup> and *tert*<sup>-/-</sup>/*ztor*<sup>+/-</sup> fish (N=3 fish). Heterozygous mutation of zTOR  
646 counteracts telomere-shortening induced Akt activation leading to a rescue of p15/p16  
647 induction. C) Representative images of SA-β-GAL staining, D) RT-qPCR analysis of p15/p16  
648 mRNA levels (N=6), E) Western blot analysis of pAkt, SOD2, p15/p16 (N=4) and F) ROS levels  
649 measurements (N=3) in whole G2 *tert* mutant and WT larvae. Second generation of *tert* mutants  
650 exhibiting extremely short telomeres show premature aging phenotype described in Fig 1, 2 and  
651 3 at larval stages. G) Experimental scheme of pharmacological inhibition of Akt in G2 *tert*<sup>-/-</sup>. H)  
652 Western blot analysis of pAkt and p15/p16 and I) RT-qPCR analysis of p15/p16 mRNA levels of  
653 G2 *tert*<sup>-/-</sup> and WT treated with Akt inhibitor. Pharmacological inhibition of Akt rescues telomere-  
654 shortening induced p15/16 expression. RT-qPCR graphs are representing mean ±SEM mRNA  
655 fold increase after normalisation by RPL13a gene expression levels (\* p-value <0.05; \*\* p-  
656 value<0.01)

657

658 **Supplemental Figure 1. Proliferative tissues of *tert*<sup>-/-</sup> zebrafish exhibit a switch from**  
659 **apoptosis to senescence with age.**

660 Quantification of Western blot analysis for DNA Damage and senescence associated genes  
661 (depicted in Fig1) in gut and testis of 3 month or 9 month-old WT and *tert*<sup>-/-</sup> siblings (N>=6 fish).  
662 At 3 month, gut and testis showed higher levels gH2AX and p53 proteins in *tert*<sup>-/-</sup> compared to  
663 WT but no differences in P15/p16 expression. At 9 month, senescence-associated p15/16  
664 expression increased in *tert* mutant compared to WT siblings. Band intensities were analysed by  
665 ImageJ and normalised by Tubulin or Actin control bands. Data are represented as mean±SEM.  
666 \* p-value <0.05; \*\* p-value<0.01 using Mann-Whitney t-test.

667

668

669 **Supplemental Figure 2. Anti-p16 antibody validation in zebrafish through antisens**  
670 **morpholino oligonucleotide knock-down of p15/p16.**

671 Representative Western blot of p15/p16 using pool of 4dpf larvae injected (at 1 cell-stage) with  
672 control, 2.4 ng or 3.6 ng of p15/p16 antisens morpholino oligonucleotides. Dose-dependent  
673 decrease of p15/p16 protein levels with p15/p16 morpholinos confirm the specificity of anti-p16  
674 (F-12) (1:50, Santa Cruz Biotechnology, sc-1661) for zebrafish p15/p16 protein.

675  
676 **Supplemental Figure 3. Bcl-XL is overexpressed in 9month but not 3month-old tert<sup>-/-</sup>.**

677 RT-qPCR analysis of Bcl-XL in gut and testis of 3 or 9 month-old tert<sup>-/-</sup> or WT siblings (N=6  
678 fish). The graphs are representing mean  $\pm$ SEM mRNA fold increase after normalisation by  
679 RPL13a gene expression levels (\* p-value <0.05; \*\* p-value<0.01) . While no differences are  
680 seen at 3 months, Bcl-XL is overexpressed in 9 month-old tert<sup>-/-</sup> gut and testis compared to WT.

681  
682 **Supplemental Figure 4. PGC1a expression is not altered in tert mutants compared to WT.**

683 A) RT-qPCR and B) representative Western blot analysis of PGC1a in gut of 3 or 9 month-old  
684 tert<sup>-/-</sup> or WT siblings (N=3 fish). The graphs are representing mean  $\pm$ SEM mRNA fold increase  
685 after normalisation by RPL13a gene expression levels (\* p-value <0.05; \*\* p-value<0.01) . No  
686 differences are detected in PGC1a expression between tert<sup>-/-</sup> and WT gut at 3 and 9 month.

687  
688 **Supplemental Figure 5. Akt pathway is not activated in young tert<sup>-/-</sup> compared to wild-**  
689 **type.**

690 Representative immunoblot of p-Akt and SOD2 and related quantification from testis and gut of  
691 3 month-old tert mutant and WT siblings (N=3). At 3 month, no differences are observed in p-  
692 Akt and SOD2 protein levels between tert<sup>-/-</sup> and WT siblings. Data are represented as  
693 mean $\pm$ SEM.

694  
695 **Supplemental Figure 6. Activation of Akt in old tert<sup>-/-</sup> leads to ROS accumulation by**  
696 **blocking the FoxO1/4-SOD2 Axis and promoting mitochondrial dysfunction.**

697 Quantification of Western blot of p-Akt, pFOXO1, pFOXO4 and SOD2 (depicted in Fig3) from  
698 testis and gut of 9 month-old tert mutant and WT siblings (N>=9). At 9 month, these proliferative  
699 tissues show an increased activation of Akt leading to the inhibition of FOXO-dependant SOD2  
700 expression. Band intensities were analysed by ImageJ and normalised by Tubulin control  
701 bands. Data are represented as mean $\pm$ SEM. \* p-value <0.05; \*\* p-value<0.01 using Mann-  
702 Whitney t-test.

703  
704 **Supplemental Figure 7. ztor haploinsufficiency is not sufficient to prevent tissue defects**  
705 **in tert<sup>-/-</sup> zebrafish.**

706 A and B) Representative haematoxylin and eosin-stained sections of gut (A) and testis (B) from  
707 11 month-old WT, tert<sup>-/-</sup>, ztor<sup>+/-</sup> and tert<sup>-/-</sup>; ztor <sup>+/-</sup> siblings (N=3 fish each). The absence of one  
708 copy of the ztor gene is not sufficient to rescue the morphological defects observed in the tert <sup>-/-</sup>  
709 at 11 month of age.

710  
711

712 **REFERENCES:**

- 713 Anchelin, M., Alcaraz-Pérez, F., Martínez, C.M., Bernabé-García, M., Mulero, V., Cayuela, M.L.,  
714 2013. Premature aging in telomerase-deficient zebrafish. *Dis. Model. Mech.* 6, 1101–12.
- 715 Aubert, G., Lansdorp, P.M., 2008. Telomeres and Aging. *Physiol. Rev.* 88, 557–579.
- 716 Balaban, R.S., Nemoto, S., Finkel, T., 2005. Mitochondria, oxidants, and aging. *Cell* 120, 483–  
717 95.
- 718 Berghmans, S., Murphey, R.D., Wienholds, E., Neuberg, D., Kutok, J.L., Fletcher, C.D.M.,  
719 Morris, J.P., Liu, T.X., Schulte-Merker, S., Kanki, J.P., Plasterk, R., Zon, L.I., Look, A.T.,  
720 2005. tp53 mutant zebrafish develop malignant peripheral nerve sheath tumors. *Proc. Natl.*  
721 *Acad. Sci. U. S. A.* 102, 407–12.
- 722 Blackburn, E.H., Francisco, S., 2001. Telomeres. *Encycl. LIFE Sci.* 1–7.
- 723 Bodnar, a G., Ouellette, M., Frolkis, M., Holt, S.E., Chiu, C.P., Morin, G.B., Harley, C.B., Shay,  
724 J.W., Lichtsteiner, S., Wright, W.E., 1998. Extension of life-span by introduction of  
725 telomerase into normal human cells. *Science* 279, 349–352.
- 726 Brunet, A., Bonni, A., Zigmond, M.J., Lin, M.Z., Juo, P., Hu, L.S., Anderson, M.J., Arden, K.C.,  
727 Blenis, J., Greenberg, M.E., 1999. Akt Promotes Cell Survival by Phosphorylating and  
728 Inhibiting a Forkhead Transcription Factor. *Cell* 96, 857–868.
- 729 Campisi, J., d’Adda di Fagagna, F., 2007. Cellular senescence: when bad things happen to  
730 good cells. *Nat. Rev. Mol. Cell Biol.* 8, 729–740.
- 731 Carneiro, M.C., Henriques, C.M., Nabais, J., Ferreira, T., Carvalho, T., Ferreira, M.G., 2016a.  
732 Short Telomeres in Key Tissues Initiate Local and Systemic Aging in Zebrafish. *PLoS*  
733 *Genet.* 12.
- 734 Carneiro, M.C., Henriques, C.M., Nabais, J., Ferreira, T., Carvalho, T., Ferreira, M.G., 2016b.  
735 Short Telomeres in Key Tissues Initiate Local and Systemic Aging in Zebrafish. *PLOS*  
736 *Genet.* 12, e1005798.
- 737 Childs, B.G., Baker, D.J., Kirkland, J.L., Campisi, J., Deursen, J.M., 2014. Senescence and  
738 apoptosis: dueling or complementary cell fates? *EMBO Rep.* 15, 1139–1153.
- 739 Coppé, J.P., Patil, C.K., Rodier, F., Sun, Y., Muñoz, D.P., Goldstein, J., Nelson, P.S., Desprez,  
740 P.Y., Campisi, J., 2008. Senescence-associated secretory phenotypes reveal cell-  
741 nonautonomous functions of oncogenic RAS and the p53 tumor suppressor. *PLoS Biol.* 6.
- 742 d’Adda di Fagagna, F., Reaper, P.M., Clay-Farrace, L., Fiegler, H., Carr, P., Von Zglinicki, T.,  
743 Saretzki, G., Carter, N.P., Jackson, S.P., 2003. A DNA damage checkpoint response in  
744 telomere-initiated senescence. *Nature* 426, 194–198.
- 745 Davaadelger, B., Duan, L., Perez, R.E., Gitelis, S., Maki, C.G., 2016. Crosstalk between the

746 IGF-1R/AKT/mTORC1 pathway and the tumor suppressors p53 and p27 determines  
747 cisplatin sensitivity and limits the effectiveness of an IGF-1R pathway inhibitor. *Oncotarget*  
748 7.

749 Ding, Y., Sun, X., Huang, W., Hoage, T., Redfield, M., Kushwaha, S., Sivasubbu, S., Lin, X.,  
750 Ekker, S., Xu, X., 2011. Haploinsufficiency of target of rapamycin attenuates  
751 cardiomyopathies in adult zebrafish. *Circ. Res.* 109, 658–69.

752 Duan, L., Maki, C.G., 2017. The IGF-1R/AKT pathway determines cell fate in response to p53.  
753 *Transl. Cancer Res.* 5, 664–675.

754 Erol, A., 2011. Deciphering the intricate regulatory mechanisms for the cellular choice between  
755 cell repair, apoptosis or senescence in response to damaging signals. *Cell. Signal.* 23,  
756 1076–1081.

757 Fan, Y., Bergmann, A., 2008. Apoptosis-induced compensatory proliferation. The Cell is dead.  
758 Long live the Cell! *Trends Cell Biol.* 18, 467–473.

759 Farnebo, M., Bykov, V.J.N., Wiman, K.G., 2010. The p53 tumor suppressor: A master regulator  
760 of diverse cellular processes and therapeutic target in cancer. *Biochem. Biophys. Res.*  
761 *Commun.* 396, 85–89.

762 Fogarty, C.E., Bergmann, A., 2017. Killers creating new life: caspases drive apoptosis-induced  
763 proliferation in tissue repair and disease. *Cell Death Differ.* 24, 1390–1400.

764 Forsyth, N.R., Wright, W.E., Shay, J.W., 2002. Telomerase and differentiation in multicellular  
765 organisms: Turn it off, turn it on, and turn it off again. *Differentiation* 69, 188–197.

766 Freund, A., Patil, C.K., Campisi, J., 2011. p38MAPK is a novel DNA damage response-  
767 independent regulator of the senescence-associated secretory phenotype. *EMBO J.* 30,  
768 1536–48.

769 Fuxe, J., Akusjärvi, G., Goike, H.M., Roos, G., Collins, V.P., Pettersson, R.F., 2000.  
770 Adenovirus-mediated overexpression of p15INK4B inhibits human glioma cell growth,  
771 induces replicative senescence, and inhibits telomerase activity similarly to p16INK4A. *Cell*  
772 *Growth Differ.* 11, 373–84.

773 Gilley, J., Fried, M., 2001. One INK4 gene and no ARF at the Fugu equivalent of the human  
774 INK4A/ARF/INK4B tumour suppressor locus. *Oncogene* 20, 7447–7452.

775 Greer, E.L., Brunet, A., 2005. FOXO transcription factors at the interface between longevity and  
776 tumor suppression. *Oncogene* 24, 7410–7425.

777 Guertin, D.A., Stevens, D.M., Thoreen, C.C., Burds, A.A., Kalaany, N.Y., Moffat, J., Brown, M.,  
778 Fitzgerald, K.J., Sabatini, D.M., 2006. Ablation in Mice of the mTORC Components raptor,  
779 rictor, or mLST8 Reveals that mTORC2 Is Required for Signaling to Akt-FOXO and PKC $\alpha$ ,

- 780 but Not S6K1. *Dev. Cell* 11, 859–871.
- 781 Harley, C.B., Futcher, a B., Greider, C.W., 1990. Telomeres shorten during ageing of human  
782 fibroblasts. *Nature*.
- 783 Hasty, P., Sharp, Z.D., Curiel, T.J., Campisi, J., 2013. mTORC1 and p53: clash of the gods?  
784 *Cell Cycle* 12, 20–5.
- 785 Hawkins, L.A., Devitt, A., 2013. Current understanding of the mechanisms for clearance of  
786 apoptotic cells-a fine balance. *J. Cell Death* 6, 57–68.
- 787 Hayflick, L., 1965. the Limited in Vitro Lifetime of Human Diploid Cell Strains. *Exp. Cell Res.* 37,  
788 614–636.
- 789 Henriques, C.M., Carneiro, M.C., Tenente, I.M., Jacinto, A., Ferreira, M.G., 2013. Telomerase is  
790 required for zebrafish lifespan. *PLoS Genet.* 9, e1003214.
- 791 Hitomi, T., Matsuzaki, Y., Yasuda, S., Kawanaka, M., Yogosawa, S., Koyama, M., Tantin, D.,  
792 Sakai, T., 2007. Oct-1 is involved in the transcriptional repression of the p15 INK4b gene.  
793 *FEBS Lett.* 581, 1087–1092.
- 794 Imai, Y., Takahashi, A., Hanyu, A., Hori, S., Sato, S., Naka, K., Hirao, A., Ohtani, N., Hara, E.,  
795 2014. Crosstalk between the Rb Pathway and AKT Signaling Forms a Quiescence-  
796 Senescence Switch. *Cell Rep.* 7, 194–207.
- 797 Jackson, S.P., Bartek, J., 2009. The DNA-damage response in human biology and disease.  
798 *Nature* 461, 1071–1078.
- 799 Jain, D., Cooper, J.P., 2010. Telomeric strategies: means to an end. *Annu. Rev. Genet.* 44,  
800 243–69.
- 801 Jones, R.G., Parsons, M., Bonnard, M., Chan, V.S.F., Yeh, W.-C., Woodgett, J.R., Ohashi, P.S.,  
802 2000. Protein Kinase B Regulates T Lymphocyte Survival, Nuclear Factor kb Activation,  
803 and Bcl-X L Levels in Vivo. *J. Exp. Med.* 191, 1721–1734.
- 804 Jung, S.H., Hwang, H.J., Kang, D., Park, H.A., Lee, H.C., Jeong, D., Lee, K., Park, H.J., Ko,  
805 Y.G., Lee, J.S., 2019. mTOR kinase leads to PTEN-loss-induced cellular senescence by  
806 phosphorylating p53. *Oncogene* 38, 1639–1650.
- 807 Kamb, A., 1995. Cell-cycle regulators and cancer. *Trends Genet.* 11, 136–40.
- 808 Kim, S.-H., Mitchell, M., Fujii, H., Llanos, S., Peters, G., 2003. Absence of p16INK4a and  
809 truncation of ARF tumor suppressors in chickens. *Proc. Natl. Acad. Sci.* 100, 211–216.
- 810 Kim, Y.Y., Jee, H.J., Um, J.H., Kim, Y.M., Bae, S.S., Yun, J., 2017. Cooperation between p21  
811 and Akt is required for p53-dependent cellular senescence. *Aging Cell* 16, 1094–1103.
- 812 Kishi, S., Bayliss, P.E., Uchiyama, J., Koshimizu, E., Qi, J., Nanjappa, P., Imamura, S., Islam,  
813 A., Neubergh, D., Amsterdam, A., Roberts, T.M., 2008. The identification of zebrafish

814 mutants showing alterations in senescence-associated biomarkers. *PLoS Genet.* 4.  
815 Kops, G.J.P.L., Dansen, T.B., Polderman, P.E., Saarloos, I., Wirtz, K.W.A., Coffey, P.J., Huang,  
816 T.-T., Bos, J.L., Medema, R.H., Burgering, B.M.T., 2002. Forkhead transcription factor  
817 FOXO3a protects quiescent cells from oxidative stress. *Nature* 419, 316–321.  
818 Krishnamurthy, J., Torrice, C., Ramsey, M.R., Kovalev, G.I., Al-Regaiey, K., Su, L., Sharpless,  
819 N.E., 2004. Ink4a/Arf expression is a biomarker of aging. *J. Clin. Invest.* 114, 1299–307.  
820 Laplante, M., Sabatini, D.M., 2009. mTOR signaling at a glance. *J. Cell Sci.* 122, 3589–94.  
821 Lee, H.W., Blasco, M. a, Gottlieb, G.J., Horner, J.W., Greider, C.W., DePinho, R. a, 1998.  
822 Essential role of mouse telomerase in highly proliferative organs. *Nature* 392, 569–74.  
823 Li, L.U., Zhao, Y., Zhang, H., 2017. P16INK4a upregulation mediated by TBK1 induces retinal  
824 ganglion cell senescence in ischemic injury. *Cell Death Dis.* 8, e2752–e2752.  
825 Li, T., Liu, X., Jiang, L., Manfredi, J., Zha, S., Gu, W., Li, T., Liu, X., Jiang, L., Manfredi, J., Zha,  
826 S., Gu, W., 2016. Loss of p53-mediated cell-cycle arrest, senescence and apoptosis  
827 promotes genomic instability and premature aging. *Oncotarget* 7, 11838–11849.  
828 Li, X., Li, B., Ni, Z., Zhou, P., Wang, B., He, J., Xiong, H., Yang, F., Wu, Y., Lyu, X., Zhang, Y.,  
829 Zeng, Y., Lian, J., He, F., 2017. Metformin Synergizes with BCL-XL/BCL-2 Inhibitor ABT-  
830 263 to Induce Apoptosis Specifically in p53-Defective Cancer Cells. *Mol. Cancer Ther.* 16,  
831 1806–1818.  
832 Liao, Y., Hung, M.-C., 2003. Regulation of the activity of p38 mitogen-activated protein kinase  
833 by Akt in cancer and adenoviral protein E1A-mediated sensitization to apoptosis. *Mol. Cell.*  
834 *Biol.* 23, 6836–48.  
835 Liao, Y., Hung, M.-C., 2010. Physiological regulation of Akt activity and stability. *Am. J. Transl.*  
836 *Res.* 2, 19–42.  
837 Liu, Y., Liu, F., Yu, H., Zhao, X., Sashida, G., Deblasio, A., Harr, M., She, Q.-B., Chen, Z., Lin,  
838 H.-K., Di Giandomenico, S., Elf, S.E., Yang, Y., Miyata, Y., Huang, G., Menendez, S.,  
839 Mellinghoff, I.K., Rosen, N., Pandolfi, P.P., Hedvat, C. V., Nimer, S.D., 2012. Akt  
840 Phosphorylates the Transcriptional Repressor Bmi1 to Block Its Effects on the Tumor-  
841 Suppressing Ink4a-Arf Locus. *Sci. Signal.* 5, ra77–ra77.  
842 López-Otín, C., Blasco, M.A., Partridge, L., Serrano, M., Kroemer, G., 2013. The Hallmarks of  
843 Aging. *Cell* 153, 1194–1217.  
844 Losick, V.P., Fox, D.T., Spradling, A.C., 2013. Polyploidization and Cell Fusion Contribute to  
845 Wound Healing in the Adult *Drosophila* Epithelium. *Curr. Biol.* 23, 2224–2232.  
846 Miyamoto, K., Araki, K.Y., Naka, K., Arai, F., Takubo, K., Yamazaki, S., Matsuoka, S.,  
847 Miyamoto, T., Ito, K., Ohmura, M., Chen, C., Hosokawa, K., Nakauchi, H., Nakayama, K.,



- 848 Nakayama, K.I., Harada, M., Motoyama, N., Suda, T., Hirao, A., 2007. Foxo3a Is Essential  
849 for Maintenance of the Hematopoietic Stem Cell Pool. *Cell Stem Cell* 1, 101–112.
- 850 Miyauchi, H., Minamino, T., Tateno, K., Kunieda, T., Toko, H., Komuro, I., 2004. Akt negatively  
851 regulates the in vitro lifespan of human endothelial cells via a p53/p21-dependent pathway.  
852 *EMBO J.* 23, 212–220.
- 853 Moral, M., Segrelles, C., Lara, M.F., Martinez-Cruz, A.B., Lorz, C., Santos, M., Garcia-  
854 Escudero, R., Lu, J., Kiguchi, K., Buitrago, A., Costa, C., Saiz, C., Rodriguez-Peralto, J.L.,  
855 Martinez-Tello, F.J., Rodriguez-Pinilla, M., Sanchez-Céspedes, M., Garin, M., Grande, T.,  
856 Bravo, A., DiGiovanni, J., Paramio, J.M., 2009. Akt Activation Synergizes with Trp53 Loss  
857 in Oral Epithelium to Produce a Novel Mouse Model for Head and Neck Squamous Cell  
858 Carcinoma. *Cancer Res.* 69, 1099–1108.
- 859 Murphy, M.P., 2009. How mitochondria produce reactive oxygen species. *Biochem. J.* 417, 1–  
860 13.
- 861 Murray-Zmijewski, F., Slee, E.A., Lu, X., 2008. A complex barcode underlies the heterogeneous  
862 response of p53 to stress. *Nat. Rev. Mol. Cell Biol.* 9, 702–712.
- 863 Neves, J., Demaria, M., Campisi, J., Jasper, H., 2015. Of flies, mice, and men: evolutionarily  
864 conserved tissue damage responses and aging. *Dev. Cell* 32, 9–18.
- 865 Nogueira, V., Park, Y., Chen, C.-C., Xu, P.-Z., Chen, M.-L., Tonic, I., Unterman, T., Hay, N.,  
866 2008. Akt Determines Replicative Senescence and Oxidative or Oncogenic Premature  
867 Senescence and Sensitizes Cells to Oxidative Apoptosis. *Cancer Cell* 14, 458–470.
- 868 O’Sullivan, R.J., Karlseder, J., 2010. Telomeres: protecting chromosomes against genome  
869 instability. *Nat. Rev. Mol. Cell Biol.* 11, 171–181.
- 870 Olovnikov, a. M., 1973. A theory of marginotomy. *J. Theor. Biol.* 41, 181–190.
- 871 Passos, J.F., Nelson, G., Wang, C., Richter, T., Simillion, C., Proctor, C.J., Miwa, S., Olijslagers,  
872 S., Hallinan, J., Wipat, A., Saretzki, G., Rudolph, K.L., Kirkwood, T.B.L., von Zglinicki, T.,  
873 2010. Feedback between p21 and reactive oxygen production is necessary for cell  
874 senescence. *Mol. Syst. Biol.* 6, 347.
- 875 Rodriguez, R., Meuth, M., 2006. Chk1 and p21 Cooperate to Prevent Apoptosis during DNA  
876 Replication Fork Stress. *Mol. Biol. Cell* 17, 402–412.
- 877 Rudolph, K.L., Chang, S., Lee, H.W., Blasco, M., Gottlieb, G.J., Greider, C., DePinho, R. a,  
878 1999. Longevity, stress response, and cancer in aging telomerase-deficient mice. *Cell* 96,  
879 701–712.
- 880 Sahin, E., Colla, S., Liesa, M., Moslehi, J., Müller, F.L., Guo, M., Cooper, M., Kotton, D., Fabian,  
881 A.J., Walkey, C., Maser, R.S., Tonon, G., Foerster, F., Xiong, R., Wang, Y.A., Shukla, S.A.,

- 882 Jaskelioff, M., Martin, E.S., Heffernan, T.P., Protopopov, A., Ivanova, E., Mahoney, J.E.,  
883 Kost-Alimova, M., Perry, S.R., Bronson, R., Liao, R., Mulligan, R., Shirihai, O.S., Chin, L.,  
884 DePinho, R.A., 2011. Telomere dysfunction induces metabolic and mitochondrial  
885 compromise. *Nature* 470, 359–65.
- 886 Sarbassov, D.D., Ali, S.M., Sabatini, D.M., 2005. Growing roles for the mTOR pathway. *Curr.*  
887 *Opin. Cell Biol.* 17, 596–603.
- 888 Schieber, N.L., Nixon, S.J., Webb, R.I., Oorschot, V.M.J., Parton, R.G., 2010. Modern  
889 Approaches for Ultrastructural Analysis of the Zebrafish Embryo. *Methods Cell Biol.* 96,  
890 425–442.
- 891 Senturk, S., Mumcuoglu, M., Gursoy-Yuzugullu, O., Cingoz, B., Akcali, K.C., Ozturk, M., 2010.  
892 Transforming growth factor-beta induces senescence in hepatocellular carcinoma cells and  
893 inhibits tumor growth. *Hepatology* 52, 966–974.
- 894 Shay, J.W., Wright, W.E., 2000. Hayflick, his limit, and cellular ageing. *Nat. Rev. Mol. Cell Biol.*  
895 1, 72–76.
- 896 Tamori, Y., Deng, W.-M., 2013. Tissue Repair through Cell Competition and Compensatory  
897 Cellular Hypertrophy in Postmitotic Epithelia. *Dev. Cell* 25, 350–363.
- 898 Tamori, Y., Deng, W.-M., 2014. Compensatory cellular hypertrophy: the other strategy for tissue  
899 homeostasis. *Trends Cell Biol.* 24, 230–237.
- 900 Tatone, C., Carbone, M.C., Falone, S., Aimola, P., Giardinelli, A., Caserta, D., Marci, R.,  
901 Pandolfi, A., Ragnelli, A.M., Amicarelli, F., 2006. Age-dependent changes in the expression  
902 of superoxide dismutases and catalase are associated with ultrastructural modifications in  
903 human granulosa cells. *MHR Basic Sci. Reprod. Med.* 12, 655–660.
- 904 Treiber, N., Maity, P., Singh, K., Kohn, M., Keist, A.F., Ferchiu, F., Sante, L., Frese, S., Bloch,  
905 W., Kreppel, F., Kochanek, S., Sindrilaru, A., Iben, S., Högel, J., Ohnmacht, M., Claes,  
906 L.E., Ignatius, A., Chung, J.H., Lee, M.J., Kamenisch, Y., Berneburg, M., Nikolaus, T.,  
907 Braunstein, K., Sperfeld, A.-D., Ludolph, A.C., Briviba, K., Wlaschek, M., Scharffetter-  
908 Kochanek, K., 2011. Accelerated aging phenotype in mice with conditional deficiency for  
909 mitochondrial superoxide dismutase in the connective tissue. *Aging Cell* 10, 239–254.
- 910 Tuteja, G., Kaestner, K.H., 2007. SnapShot: Forkhead Transcription Factors II. *Cell* 131, 192-  
911 192.e1.
- 912 Velarde, M.C., Flynn, J.M., Day, N.U., Melov, S., Campisi, J., 2012. Mitochondrial oxidative  
913 stress caused by Sod2 deficiency promotes cellular senescence and aging phenotypes in  
914 the skin. *Aging (Albany, NY)*. 4, 3–12.
- 915 Vétillard, A., Jonchère, B., Moreau, M., Toutain, B., Henry, C., Fontanel, S., Bernard, A.-C.,

916           Campone, M., Guette, C., Coqueret, O., 2015. Akt inhibition improves irinotecan treatment  
917           and prevents cell emergence by switching the senescence response to apoptosis.  
918           Oncotarget 6.  
919       Vidal, A., Koff, A., 2000. Cell-cycle inhibitors: three families united by a common cause. *Gene*  
920           247, 1–15.  
921       Vogelstein, B., Lane, D., Levine, A.J., 2000. Surfing the p53 network. *Nature* 408, 307–310.  
922

Figure 1.

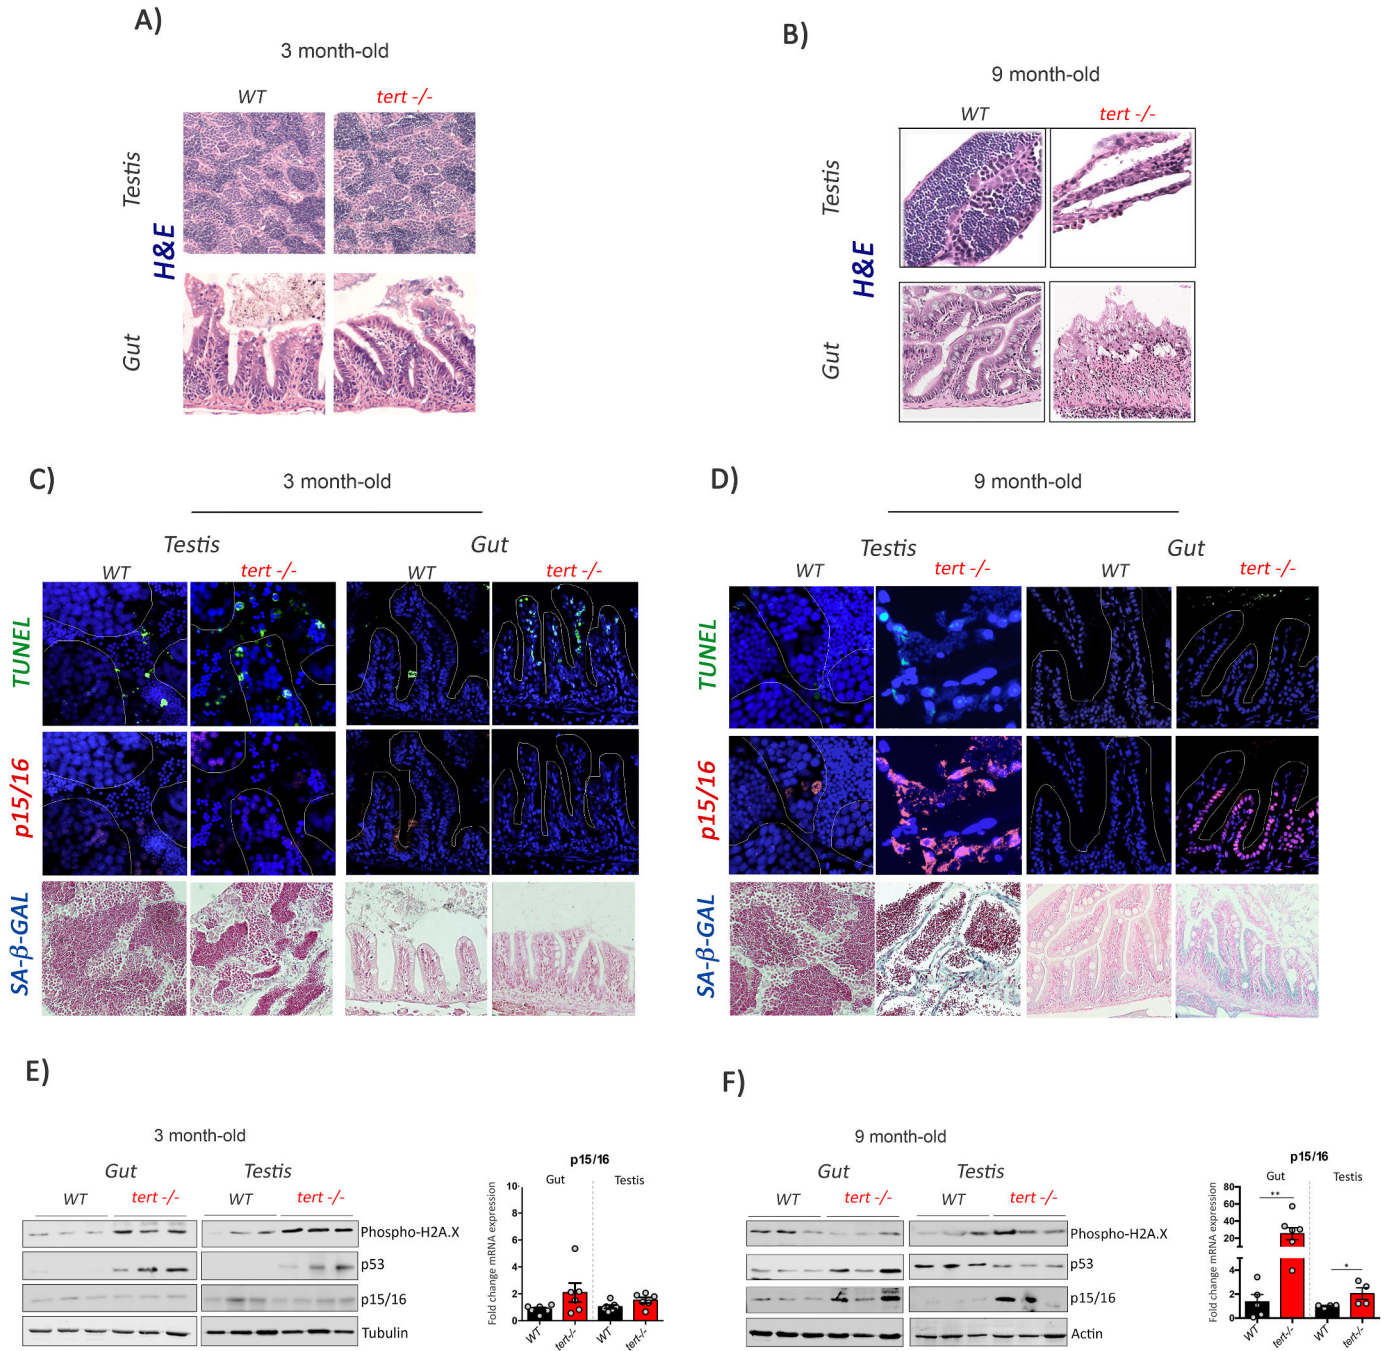

Figure 2.

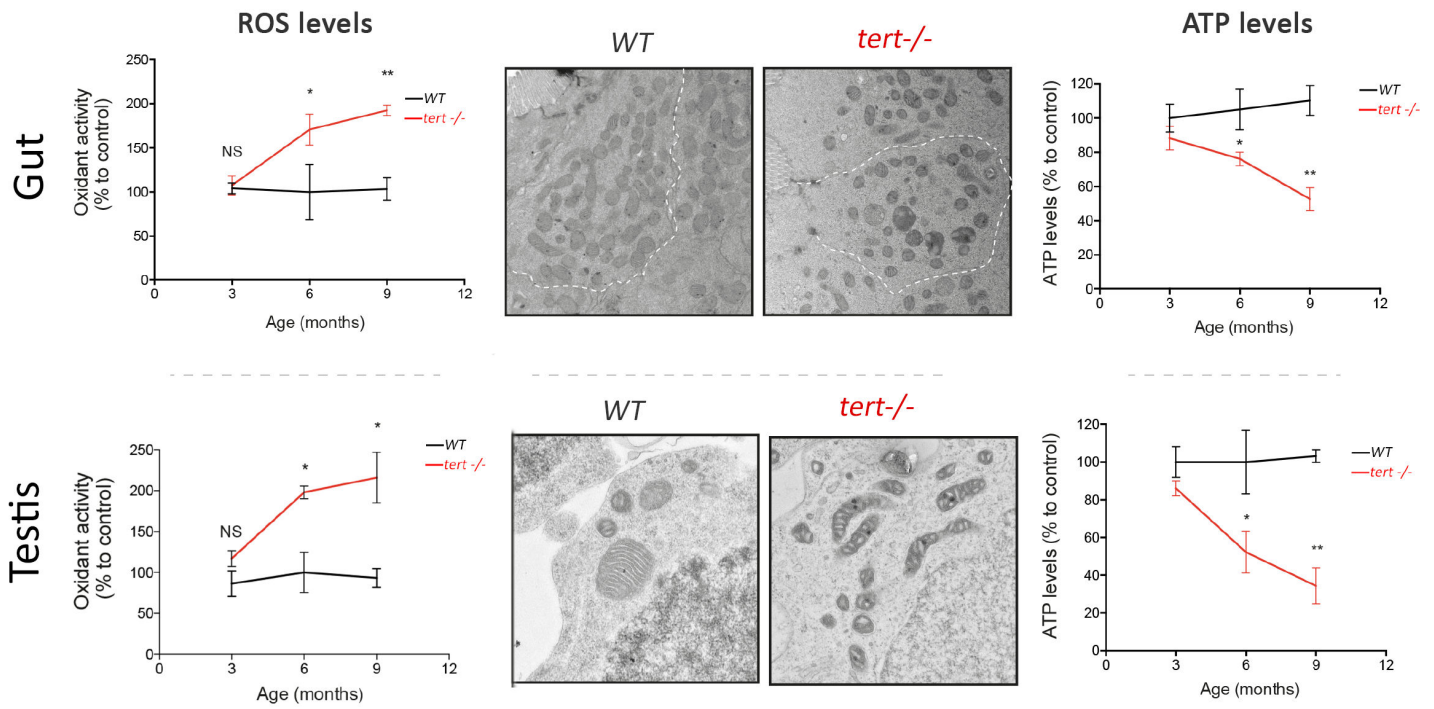

Figure 3.

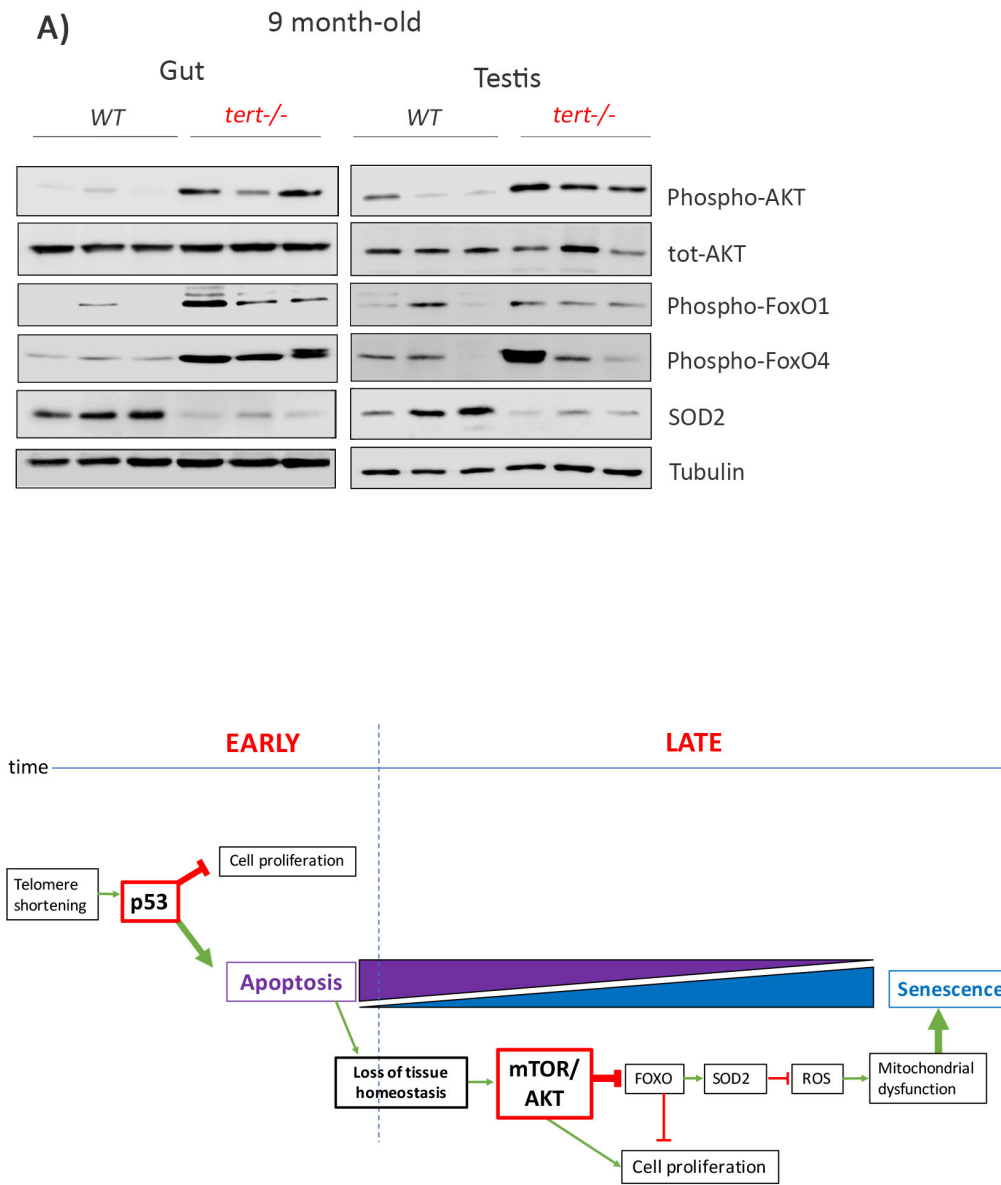

Figure 4.

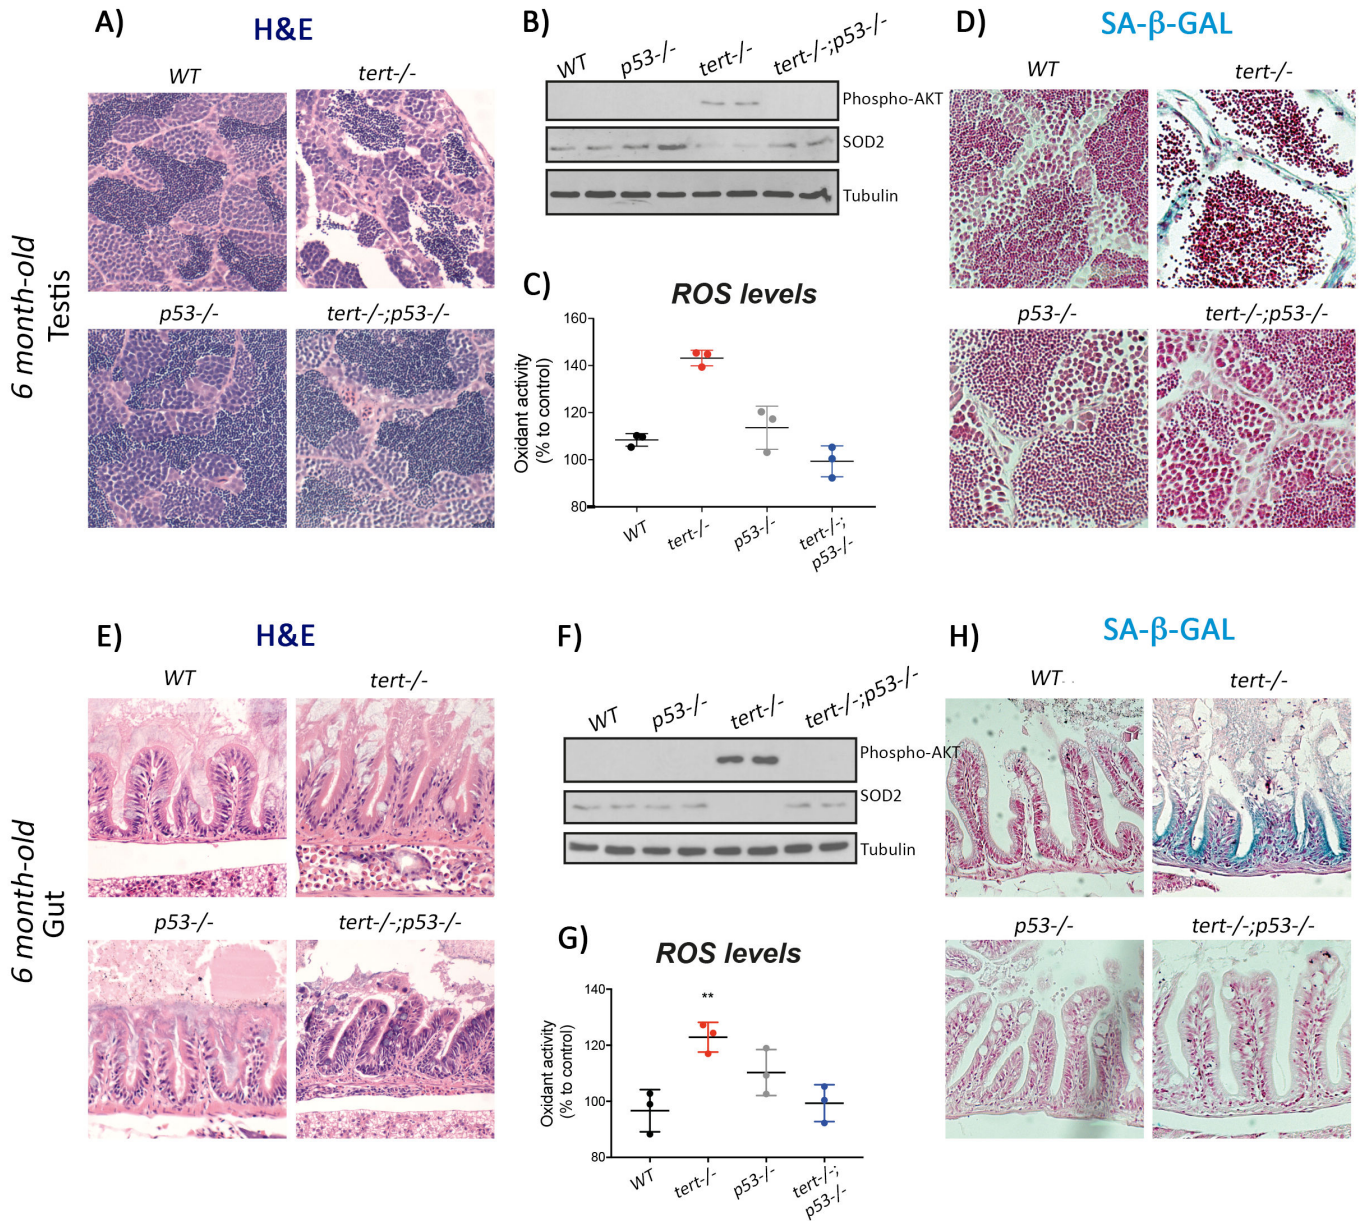

Fig. 5

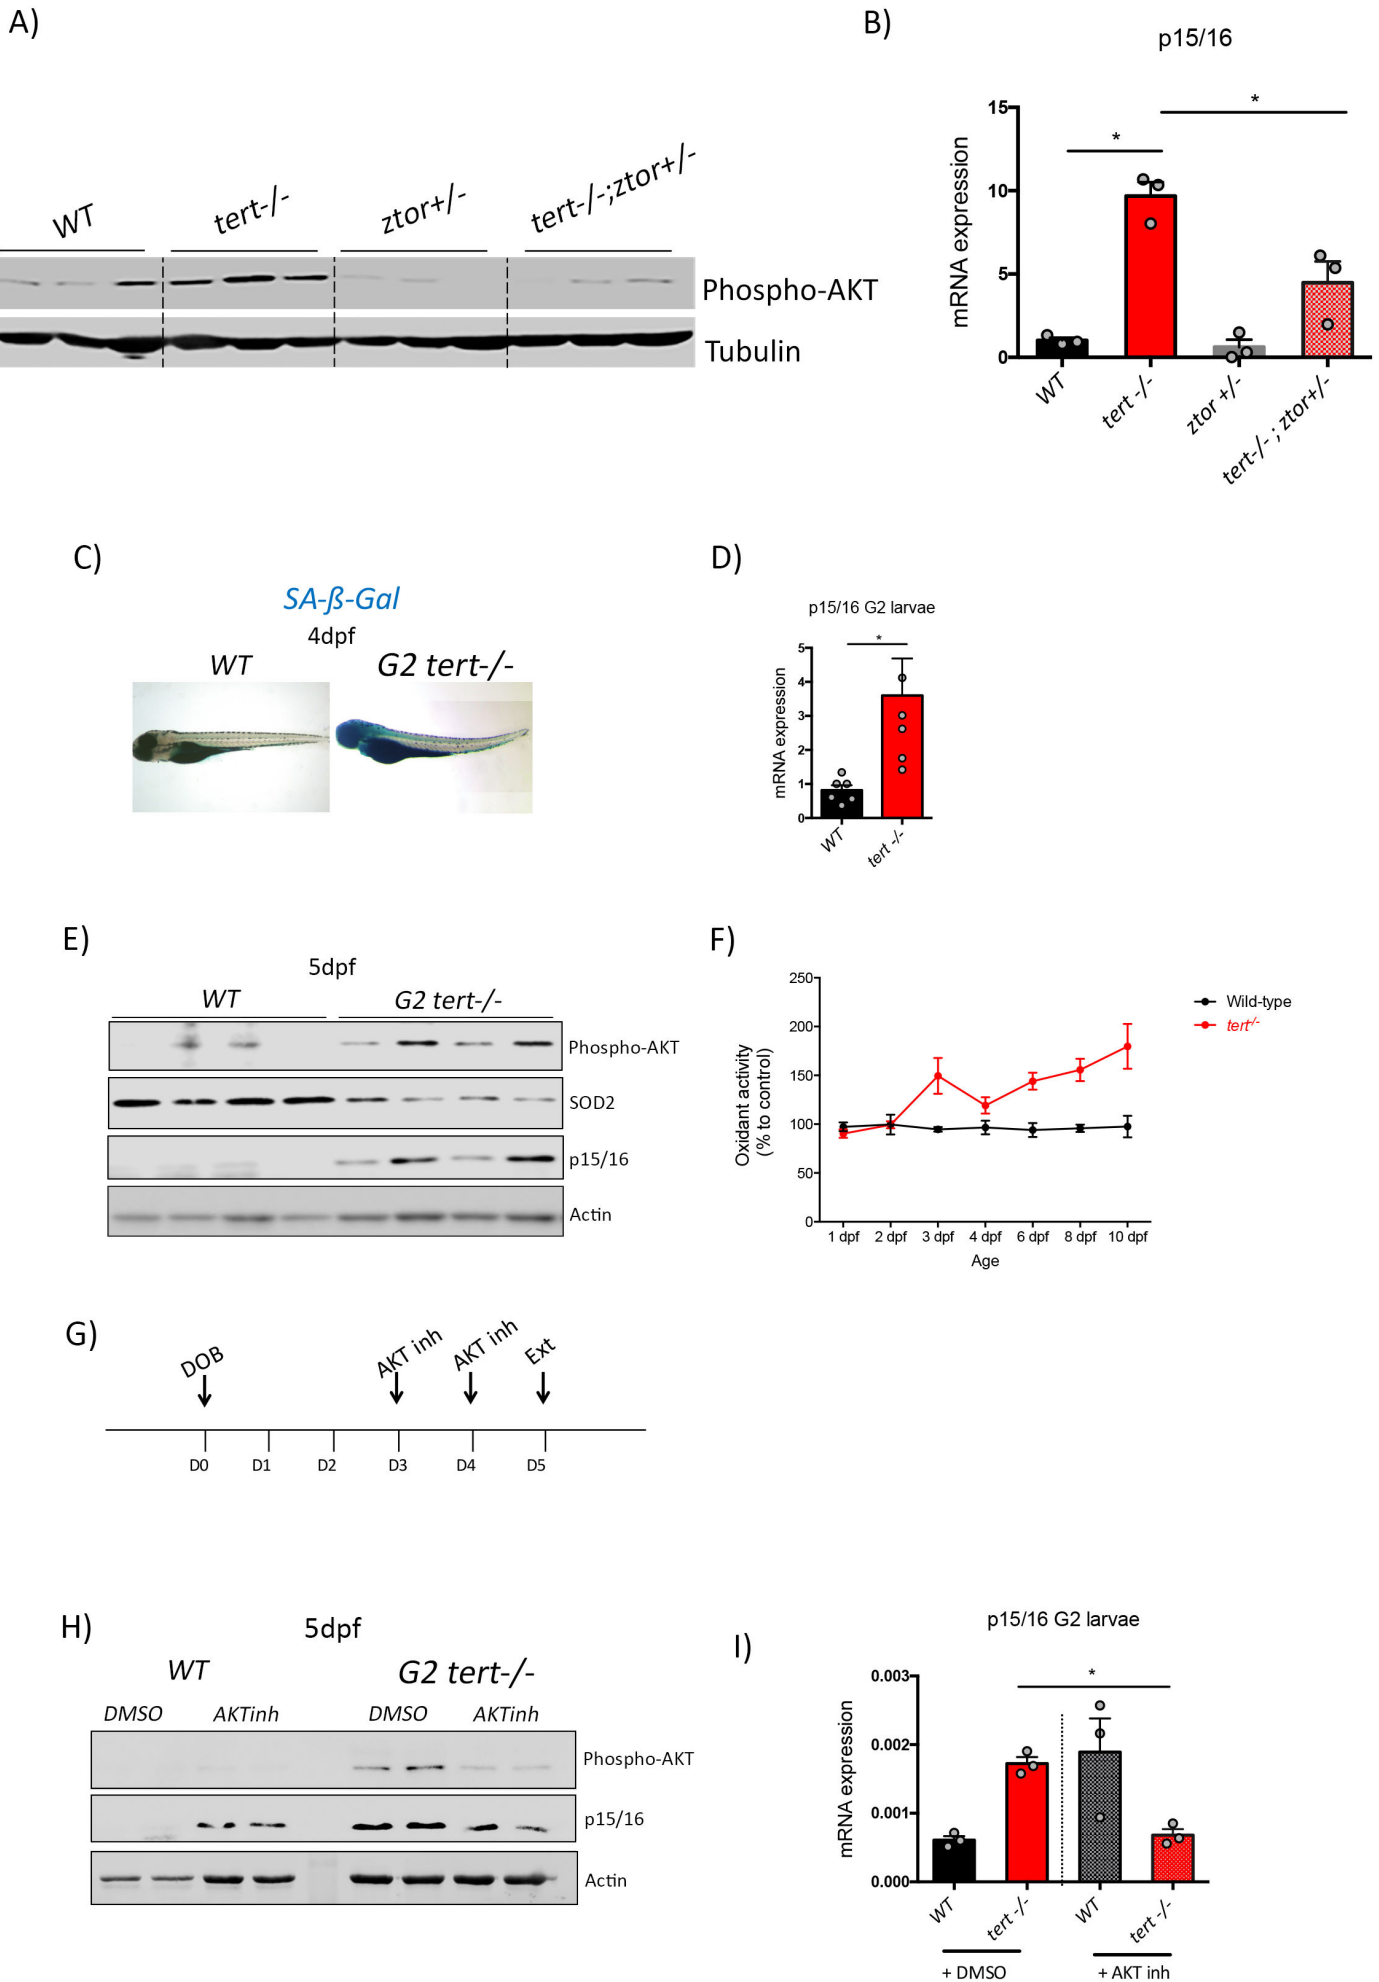



## Supplemental Figure 1

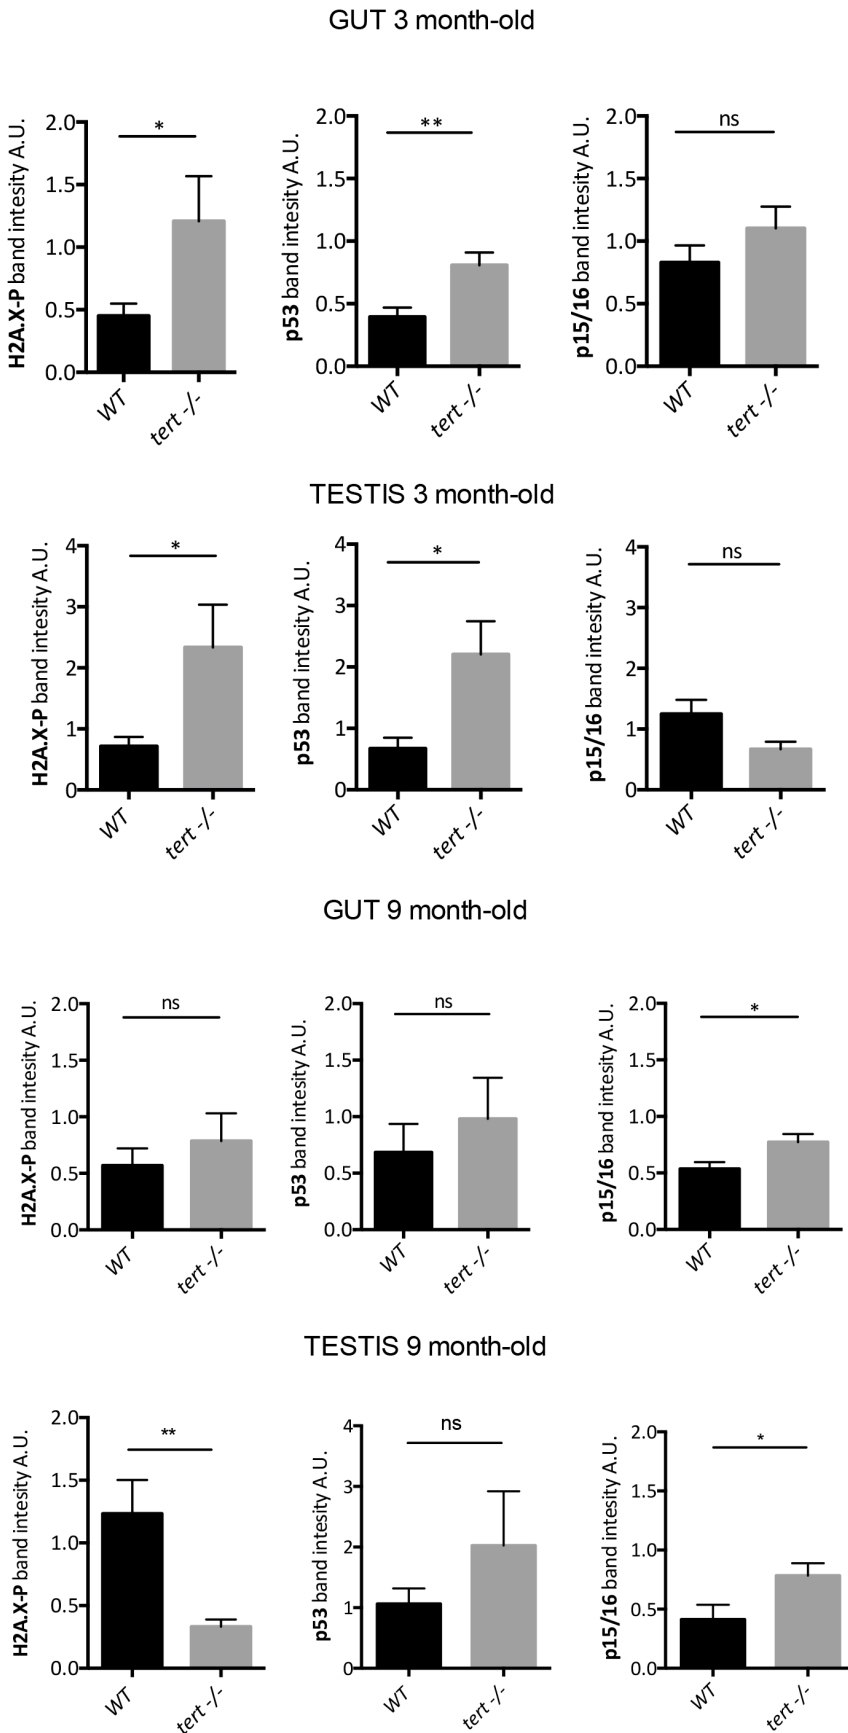

\* p-value < 0.05 Mann-Whitney t-test

\*\* p-value < 0.01 Mann-Whitney t-test

## Supplemental Figure 2

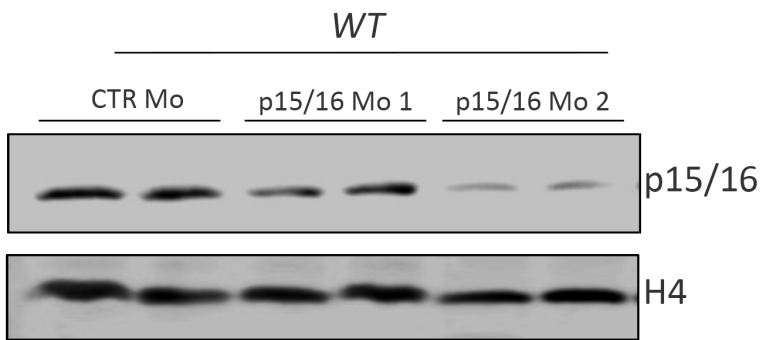

## Supplemental Figure 3

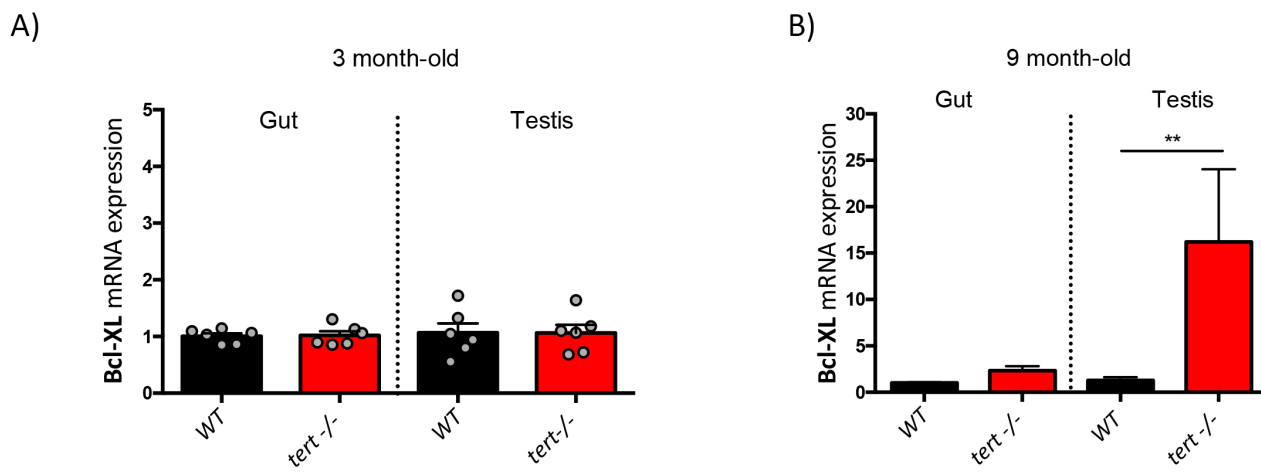

## Supplemental Figure 4

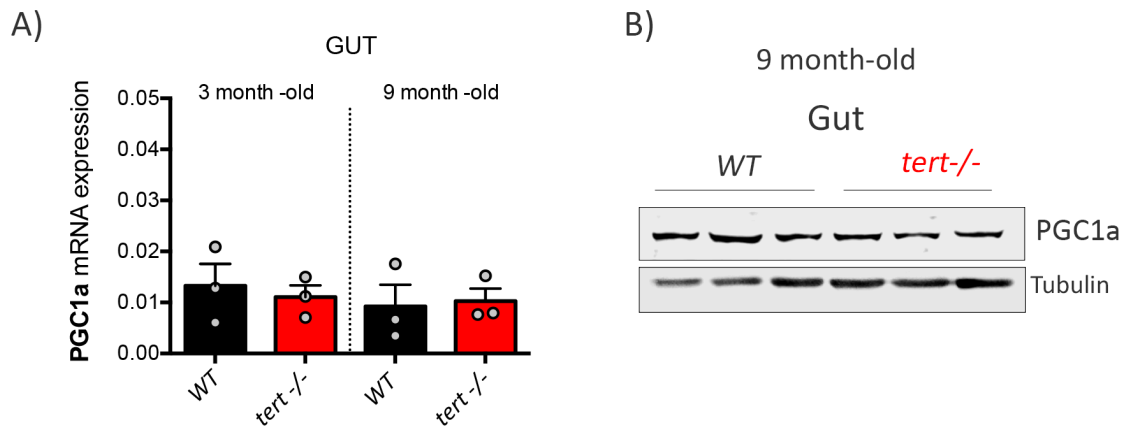

## Supplemental Figure 5

### GUT 3 month-old

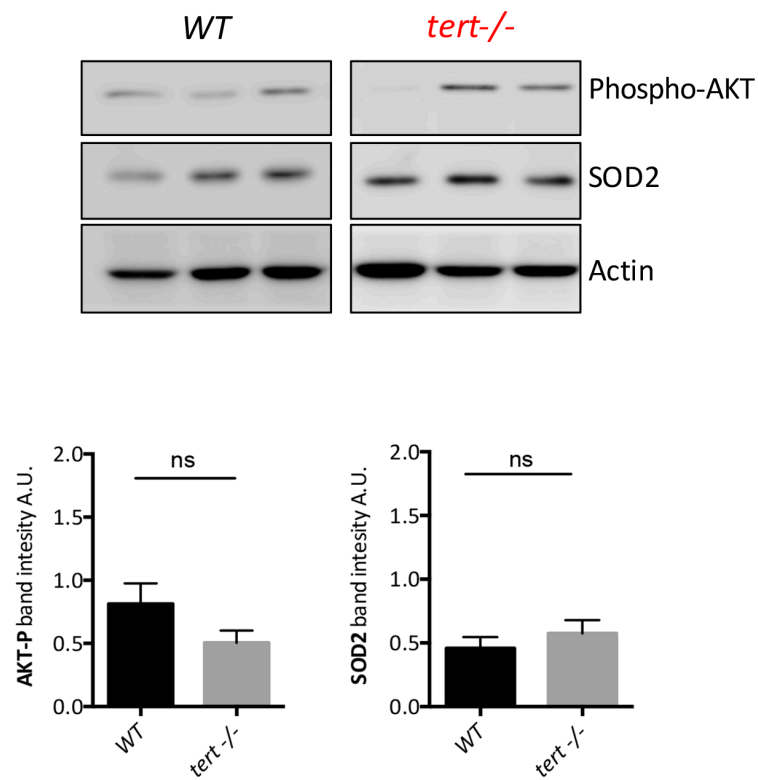

ns: not significant Mann-Whitney t-test

## Supplemental Figure 6

### GUT 9 month-old

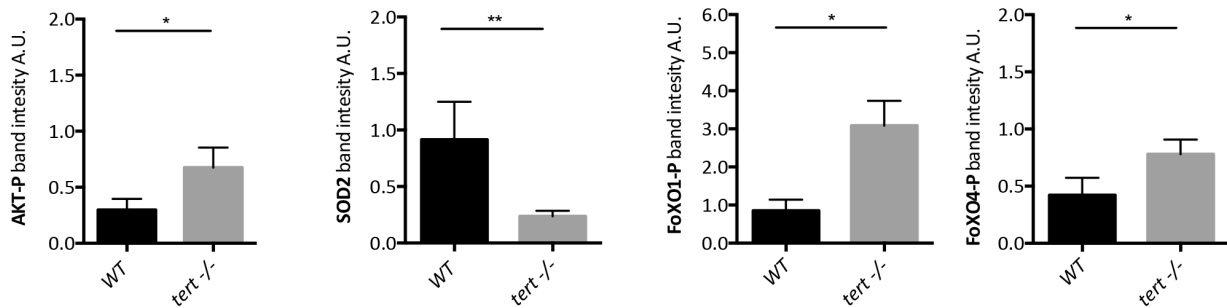

### TESTIS 9 month-old

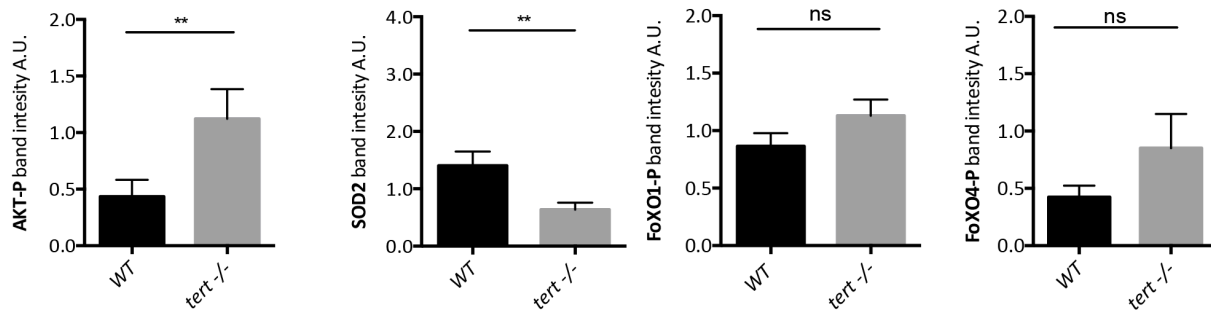

\* p-value < 0.05 Mann-Whitney t-test

\*\* p-value < 0.01 Mann-Whitney t-test

## Supplemental Figure 7

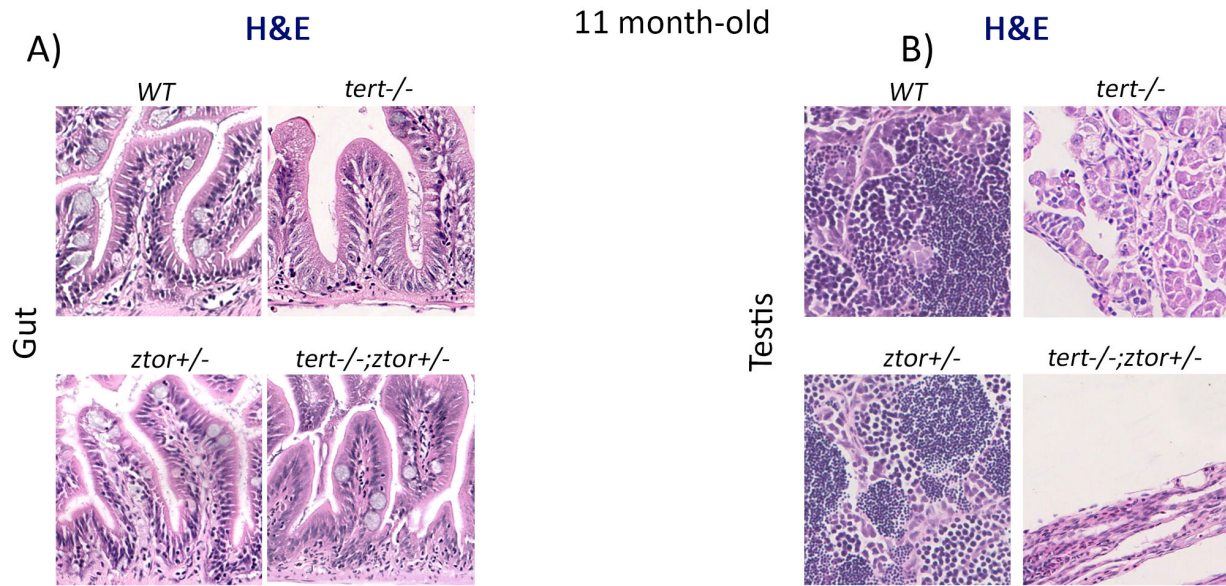

Source: https://www.biorxiv.org/content/10.1101/2020.01.10.901603v1.full.pdf
